# Supplementary material for: Indirect synthetic route to α-l-fucosides via highly stereoselective construction of α-l-galactosides followed by C6-deoxygenation
Source: Royal Society of Chemistry journal article supplement (doi:10.1039/d0ob01128b), 2020-01-01

## Electronic Supplementary Information

### Indirect synthetic route to $\alpha$ -L-fucosides via highly stereoselective construction of $\alpha$ -L-galactosides followed by C6-deoxygenation

Hiroataka Tomida,<sup>a</sup> Takuya Matsuhashi,<sup>a</sup> Hide-Nori Tanaka,<sup>b,c</sup> Naoko Komura,<sup>b,c</sup>

Hiromune Ando,<sup>b,c</sup> Akihiro Imamura,<sup>\*a</sup> Hideharu Ishida<sup>\*a,b,c</sup>

<sup>a</sup> Department of Applied Bioorganic Chemistry, Gifu University, 1-1 Yanagido, Gifu 501-1193, Japan

<sup>b</sup> Institute for Glyco-core Research (iGCORE), Tokai National Higher Education and Research System, 1-1 Yanagido, Gifu 501-1193, Japan

<sup>c</sup> Center for Highly Advanced Integration of Nano and Life Sciences (G-CHAIN), Gifu University, 1-1 Yanagido, Gifu 501-1193, Japan

#### Table of Contents

| Compound                                                                                                                                                          | Spectra |
|-------------------------------------------------------------------------------------------------------------------------------------------------------------------|---------|
| Phenyl 2,3,4,6-tetra- <i>O</i> -acety-1-thio-L-galactopyranoside ( <b>5</b> )                                                                                     | S-4     |
| Phenyl 1-thio-L-galactopyranoside ( <b>6</b> )                                                                                                                    | S-5     |
| Phenyl 4,6- <i>O</i> -di- <i>tert</i> -butylsilylene-1-thio- $\beta$ -L-galactopyranoside ( <b>7</b> )                                                            | S-6     |
| Phenyl 2,3-di- <i>O</i> -benzyl-4,6- <i>O</i> -di- <i>tert</i> -butylsilylene-1-thio- $\beta$ -L-galactopyranoside ( <b>8</b> )                                   | S-7     |
| Phenyl 4,6- <i>O</i> -di- <i>tert</i> -butylsilylene-3- <i>O</i> - <i>p</i> -methoxybenzyl-1-thio- $\beta$ -L-galactopyranoside ( <b>10</b> )                     | S-8     |
| Phenyl 2- <i>O</i> -benzyl-4,6- <i>O</i> -di- <i>tert</i> -butylsilylene-3- <i>O</i> - <i>p</i> -methoxybenzyl-1-thio- $\beta$ -L-galactopyranoside ( <b>11</b> ) | S-9     |
| 2- <i>O</i> -Benzyl-4,6- <i>O</i> -di- <i>tert</i> -butylsilylene-3- <i>O</i> - <i>p</i> -methoxybenzyl- $\alpha$ -L-galactopyranosyl fluoride ( <b>12</b> )      | S-10    |
| 2- <i>O</i> -Benzyl-4,6- <i>O</i> -di- <i>tert</i> -butylsilylene- $\alpha$ -L-galactopyranosyl fluoride ( <b>13</b> )                                            | S-11    |

|                                                                                                                                                                                                                                                                                                                                                                                                                                                                                                                                                                                                                                                |      |
|------------------------------------------------------------------------------------------------------------------------------------------------------------------------------------------------------------------------------------------------------------------------------------------------------------------------------------------------------------------------------------------------------------------------------------------------------------------------------------------------------------------------------------------------------------------------------------------------------------------------------------------------|------|
| 3- <i>O</i> -Acetyl-2- <i>O</i> -benzyl-4,6- <i>O</i> -di- <i>tert</i> -butylsilylene- $\alpha$ -L-galactopyranosyl fluoride ( <b>14</b> )                                                                                                                                                                                                                                                                                                                                                                                                                                                                                                     | S-12 |
| 2-(Trimethylsilyl)ethyl (2,3-di- <i>O</i> -benzyl-4,6- <i>O</i> -di- <i>tert</i> -butylsilylene- $\alpha$ -L-galactopyranosyl)-(1 $\rightarrow$ 2)-6- <i>O</i> -benzoyl-3,4- <i>O</i> -isopropylidene- $\beta$ -D-galactopyranoside ( <b>23</b> )                                                                                                                                                                                                                                                                                                                                                                                              | S-13 |
| 2-(Trimethylsilyl)ethyl (2,3-di- <i>O</i> -benzyl-4,6- <i>O</i> -di- <i>tert</i> -butylsilylene- $\alpha$ -L-galactopyranosyl)-(1 $\rightarrow$ 3)-4,6- <i>O</i> -benzylidene-2-deoxy-2-(2,2,2-trichloroethoxycarbamoyl)- $\beta$ -D-glucopyranoside ( <b>24</b> )                                                                                                                                                                                                                                                                                                                                                                             | S-14 |
| 2-(Trimethylsilyl)ethyl (2,3-di- <i>O</i> -benzyl-4,6- <i>O</i> -di- <i>tert</i> -butylsilylene- $\alpha$ -L-galactopyranosyl)-(1 $\rightarrow$ 3)-4,6- <i>O</i> -benzylidene-2-deoxy-2-phthalimido- $\beta$ -D-glucopyranoside ( <b>25</b> )                                                                                                                                                                                                                                                                                                                                                                                                  | S-15 |
| Benzyl (2,3-di- <i>O</i> -benzyl-4,6- <i>O</i> -di- <i>tert</i> -butylsilylene- $\alpha$ -L-galactopyranosyl)-(1 $\rightarrow$ 3)-2,4-di- <i>O</i> -benzyl- $\beta$ -L-fucopyranoside ( <b>26</b> )                                                                                                                                                                                                                                                                                                                                                                                                                                            | S-16 |
| 2-(Trimethylsilyl)ethyl (2,3-di- <i>O</i> -benzyl-4,6- <i>O</i> -di- <i>tert</i> -butylsilylene- $\alpha$ -L-galactopyranosyl)-(1 $\rightarrow$ 6)-3- <i>O</i> -acetyl-4- <i>O</i> -benzyl-2-deoxy-2-(2,2,2-trichloroethoxycarbamoyl)- $\beta$ -D-glucopyranoside ( <b>27</b> )                                                                                                                                                                                                                                                                                                                                                                | S-17 |
| Phenyl (3- <i>O</i> -acetyl-2- <i>O</i> -benzyl-4,6- <i>O</i> -di- <i>tert</i> -butylsilylene- $\alpha$ -L-galactopyranosyl)-(1 $\rightarrow$ 3)-2- <i>O</i> -benzyl-4,6- <i>O</i> -di- <i>tert</i> -butylsilylene-1-thio- $\beta$ -L-galactopyranoside ( <b>28</b> )                                                                                                                                                                                                                                                                                                                                                                          | S-18 |
| 2-( <i>p</i> -Methoxyphenoxy)ethyl (3- <i>O</i> -acetyl-2- <i>O</i> -benzyl-4,6- <i>O</i> -di- <i>tert</i> -butylsilylene- $\alpha$ -L-galactopyranosyl)-(1 $\rightarrow$ 3)-(2- <i>O</i> -benzyl-4,6- <i>O</i> -di- <i>tert</i> -butylsilylene- $\alpha$ -L-galactopyranosyl)-(1 $\rightarrow$ 3)-(2- <i>O</i> -benzyl-4,6- <i>O</i> -di- <i>tert</i> -butylsilylene- $\alpha$ -L-galactopyranosyl)-(1 $\rightarrow$ 3)-2- <i>O</i> -benzyl-4,6- <i>O</i> -di- <i>tert</i> -butylsilylene- $\alpha$ -L-galactopyranoside ( <b>29</b> )                                                                                                        | S-19 |
| 2-( <i>p</i> -Methoxyphenoxy)ethyl (2,3-di- <i>O</i> -benzyl-4,6- <i>O</i> -di- <i>tert</i> -butylsilylene- $\alpha$ -L-galactopyranosyl)-(1 $\rightarrow$ 3)-(2- <i>O</i> -benzyl-4,6- <i>O</i> -di- <i>tert</i> -butylsilylene- $\alpha$ -L-galactopyranosyl)-(1 $\rightarrow$ 3)-(2- <i>O</i> -benzyl-4,6- <i>O</i> -di- <i>tert</i> -butylsilylene- $\alpha$ -L-galactopyranosyl)-(1 $\rightarrow$ 3)-(2- <i>O</i> -benzyl-4,6- <i>O</i> -di- <i>tert</i> -butylsilylene- $\alpha$ -L-galactopyranosyl)-(1 $\rightarrow$ 3)-2- <i>O</i> -benzyl-4,6- <i>O</i> -di- <i>tert</i> -butylsilylene- $\alpha$ -L-galactopyranoside ( <b>30</b> ) | S-20 |
| <i>p</i> -Methoxyphenyl 2,3-di- <i>O</i> -benzyl-6-deoxy-6-iodo- $\beta$ -D-galactopyranoside                                                                                                                                                                                                                                                                                                                                                                                                                                                                                                                                                  | S-21 |

|                                                                                                                                                                                                                                          |      |
|------------------------------------------------------------------------------------------------------------------------------------------------------------------------------------------------------------------------------------------|------|
| (33)                                                                                                                                                                                                                                     |      |
| <i>p</i> -Methoxyphenyl 2,3-di- <i>O</i> -benzoyl-6-deoxy-6-iodo- $\beta$ -D-galactopyranoside (34)                                                                                                                                      | S-22 |
| <i>p</i> -Methoxyphenyl 2,3-di- <i>O</i> -benzyl-6- <i>O</i> -phenoxythiocarbonyl- $\beta$ -D-galactopyranoside (35)                                                                                                                     | S-23 |
| <i>p</i> -Methoxyphenyl 2,3-di- <i>O</i> -benzoyl-6- <i>O</i> -phenoxythiocarbonyl- $\beta$ -D-galactopyranoside (36)                                                                                                                    | S-24 |
| <i>p</i> -Methoxyphenyl 2,3-di- <i>O</i> -benzyl-6- <i>O</i> - <i>p</i> -toluenesulfonyl- $\beta$ -D-galactopyranoside (37)                                                                                                              | S-25 |
| <i>p</i> -Methoxyphenyl 2,3-di- <i>O</i> -benzyl-6-deoxy- $\beta$ -D-galactopyranoside (38)                                                                                                                                              | S-26 |
| <i>p</i> -Methoxyphenyl 2,3-di- <i>O</i> -benzoyl-6-deoxy- $\beta$ -D-galactopyranoside (39)                                                                                                                                             | S-27 |
| 2-(Trimethylsilyl)ethyl (2,3-di- <i>O</i> -benzyl- $\alpha$ -L-galactopyranosyl)-(1 $\rightarrow$ 2)-6- <i>O</i> -benzoyl-3,4- <i>O</i> -isopropylidene- $\beta$ -D-galactopyranoside (42)                                               | S-28 |
| 2-(Trimethylsilyl)ethyl (2,3-di- <i>O</i> -benzyl- $\alpha$ -L-fucopyranosyl)-(1 $\rightarrow$ 2)-6- <i>O</i> -benzoyl-3,4- <i>O</i> -isopropylidene- $\beta$ -D-galactopyranoside (43)                                                  | S-29 |
| 2-(Trimethylsilyl)ethyl (2,3-di- <i>O</i> -benzyl- $\alpha$ -L-galactopyranosyl)-(1 $\rightarrow$ 6)-2-acetamido-3- <i>O</i> -acetyl-4- <i>O</i> -benzyl-2-deoxy- $\beta$ -D-glucopyranoside (44)                                        | S-30 |
| 2-(Trimethylsilyl)ethyl (2,3-di- <i>O</i> -benzyl-6- <i>O</i> -phenoxythiocarbonyl- $\alpha$ -L-galactopyranosyl)-(1 $\rightarrow$ 6)-2-acetamido-3- <i>O</i> -acetyl-4- <i>O</i> -benzyl-2-deoxy- $\beta$ -D-glucopyranoside (45)       | S-31 |
| 2-(Trimethylsilyl)ethyl (2,3-di- <i>O</i> -benzyl- $\alpha$ -L-fucopyranosyl)-(1 $\rightarrow$ 6)-2-acetamido-3- <i>O</i> -acetyl-4- <i>O</i> -benzyl-2-deoxy- $\beta$ -D-glucopyranoside (46)                                           | S-32 |
| 1-Octyl (2,3-di- <i>O</i> -benzyl-4,6- <i>O</i> -di- <i>tert</i> -butylsilylene- $\alpha$ -L-galactopyranosyl)-(1 $\rightarrow$ 3)-2- <i>O</i> -benzyl-4,6- <i>O</i> -di- <i>tert</i> -butylsilylene- $\alpha$ -L-galactopyranoside (47) | S-33 |
| 1-Octyl (2,3-di- <i>O</i> -benzyl- $\alpha$ -L-galactopyranosyl)-(1 $\rightarrow$ 3)-2- <i>O</i> -benzyl- $\alpha$ -L-galactopyranoside (48)                                                                                             | S-34 |
| 1-Octyl (2,3-di- <i>O</i> -benzyl-6- <i>O</i> - <i>p</i> -toluenesulfonyl- $\alpha$ -L-galactopyranosyl)-(1 $\rightarrow$ 3)-2- <i>O</i> -benzyl-6- <i>O</i> - <i>p</i> -toluenesulfonyl- $\alpha$ -L-galactopyranoside (49)             | S-35 |
| 1-Octyl (2,3-di- <i>O</i> -benzyl- $\alpha$ -L-fucopyranosyl)-(1 $\rightarrow$ 3)-2- <i>O</i> -benzyl- $\alpha$ -L-fucopyranoside (50)                                                                                                   | S-36 |

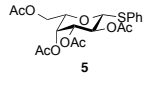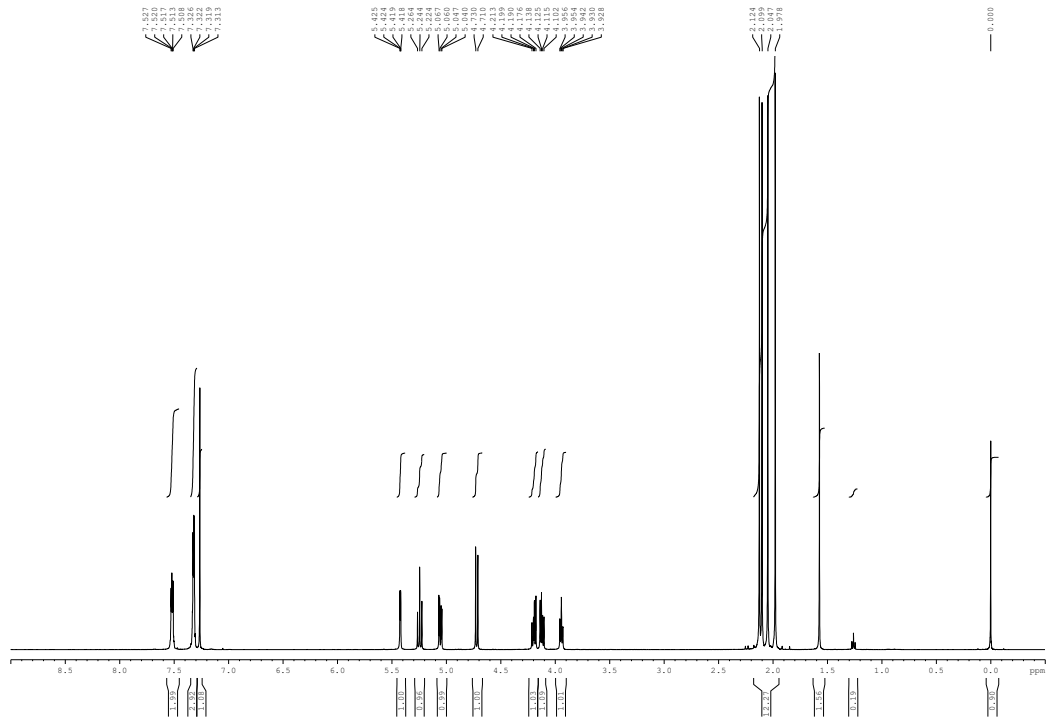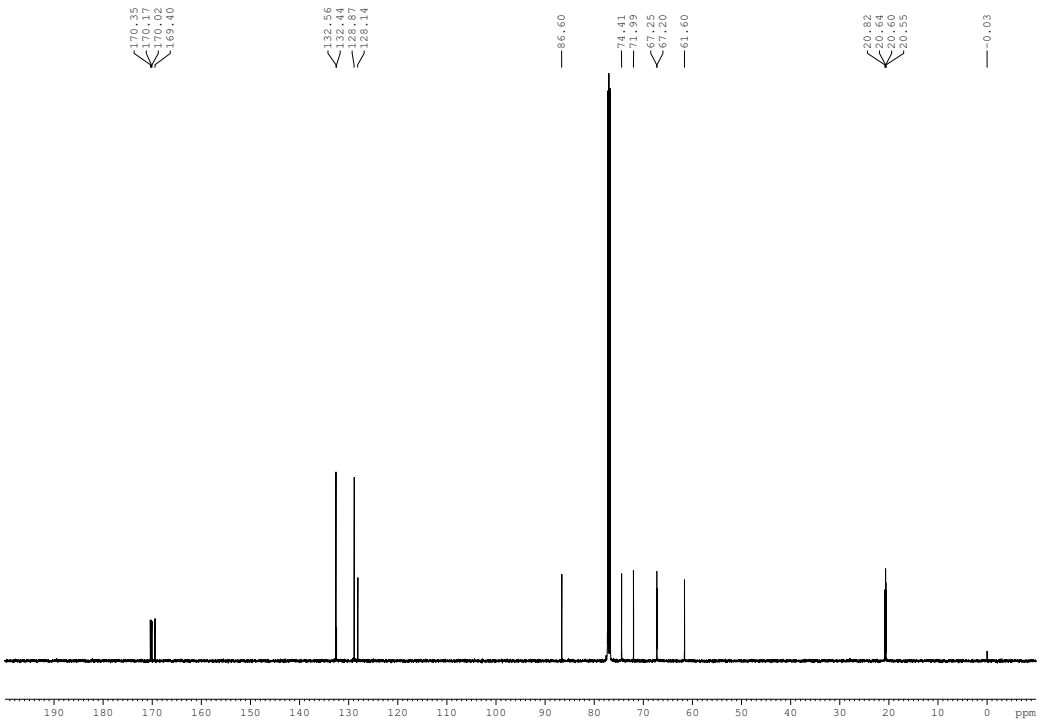





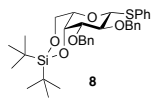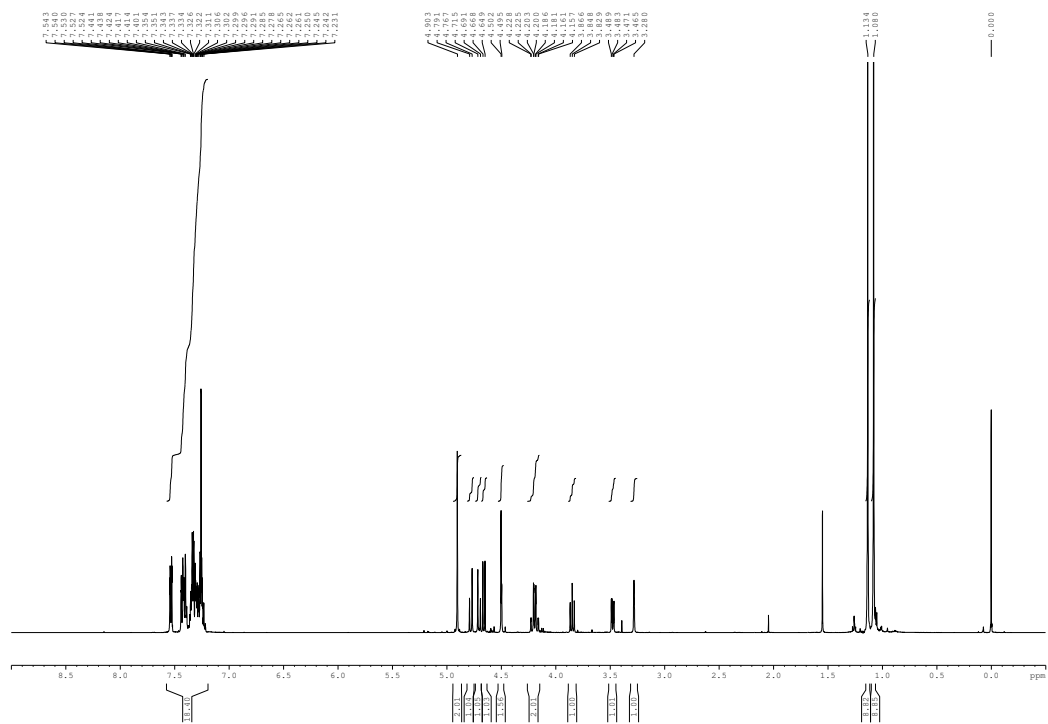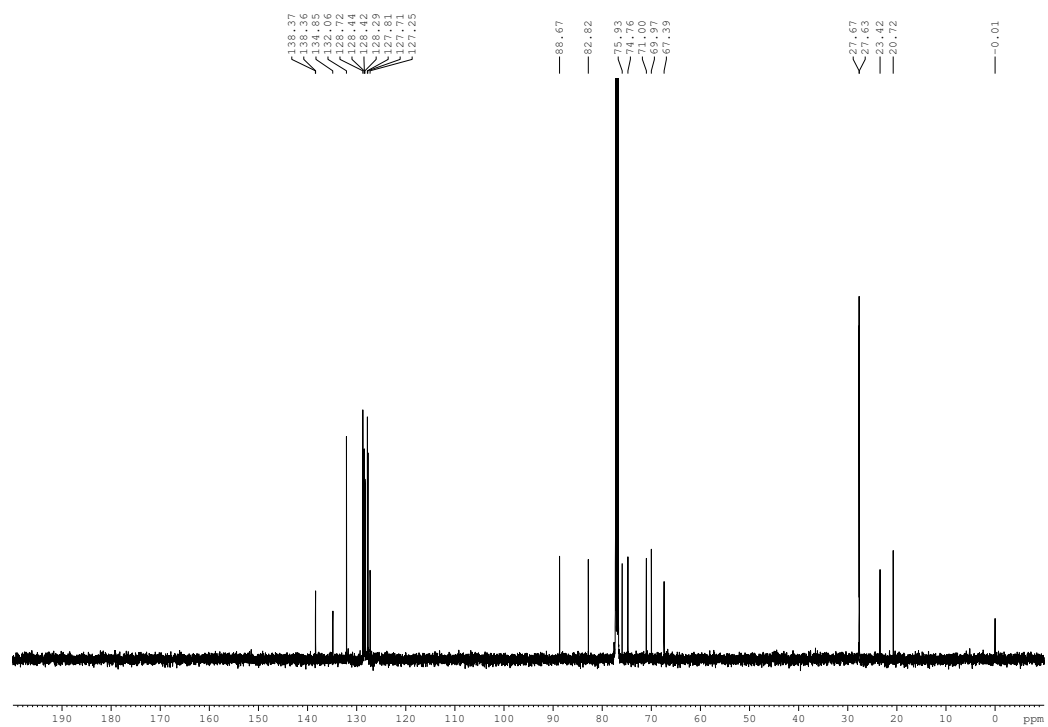





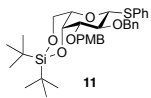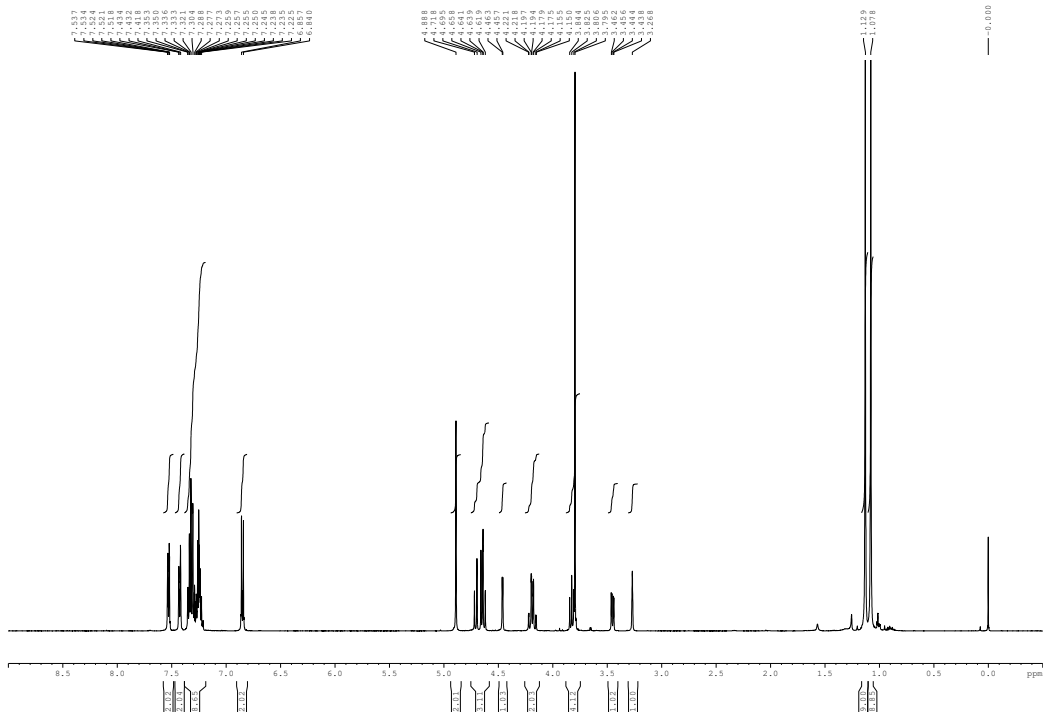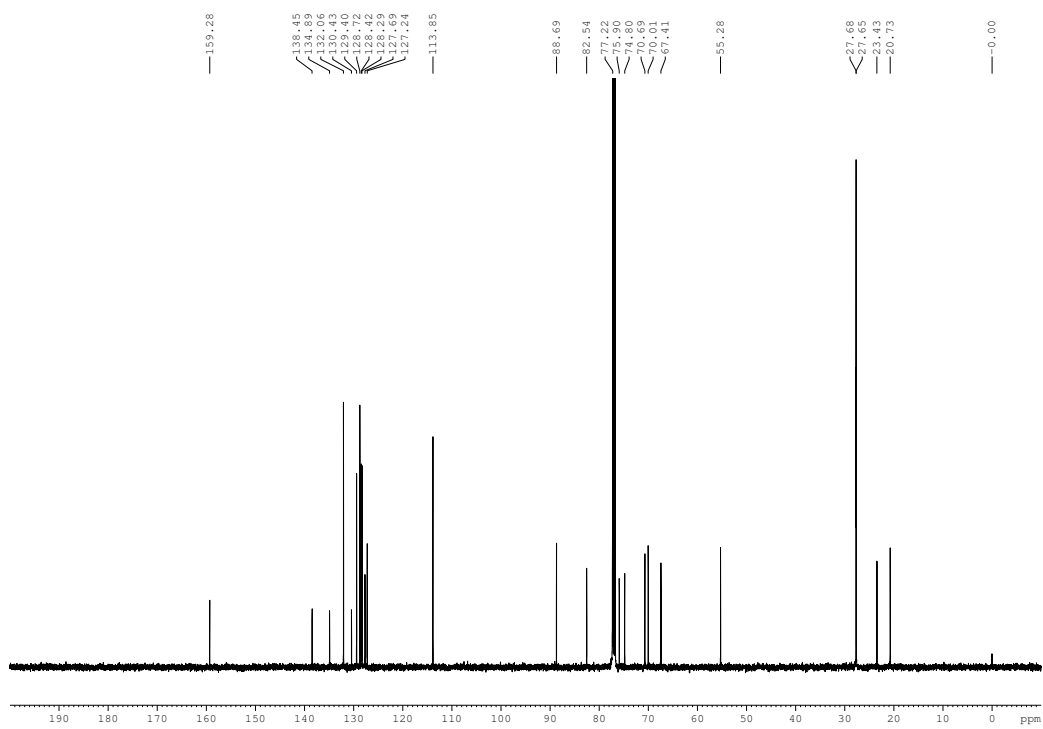

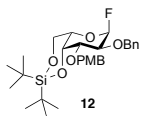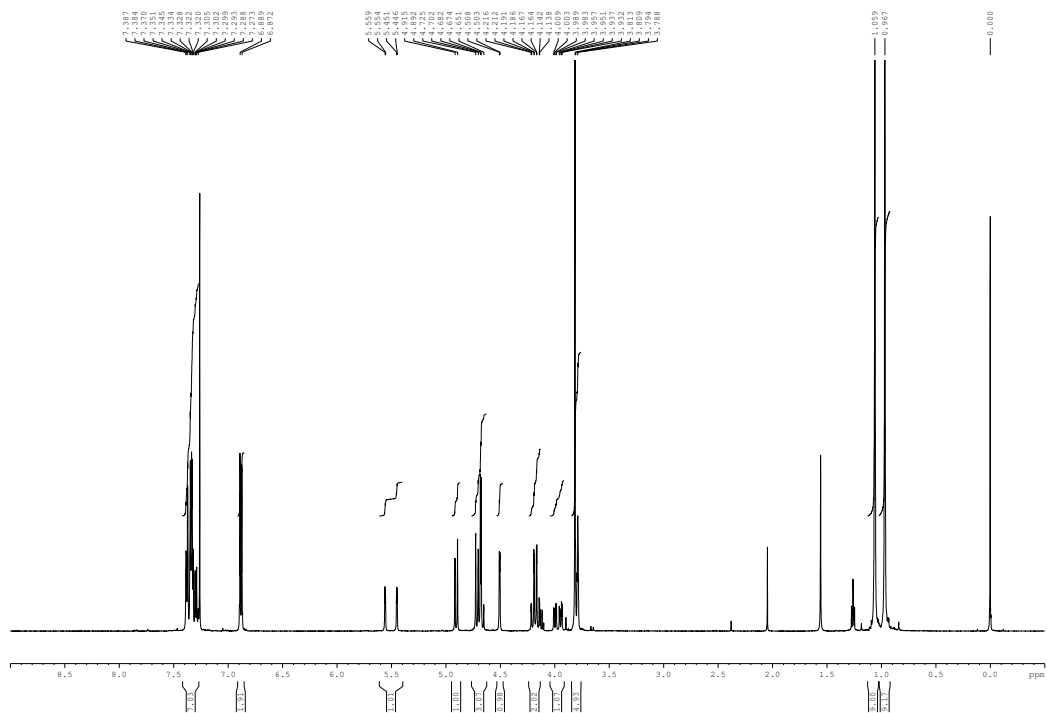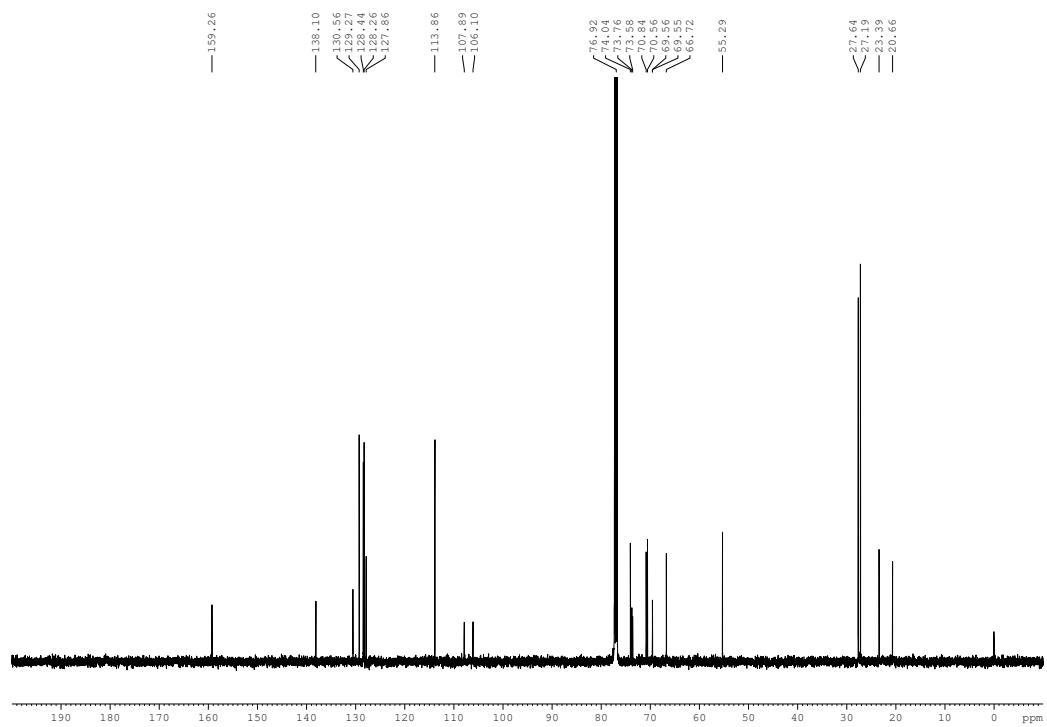

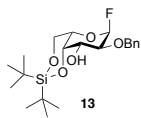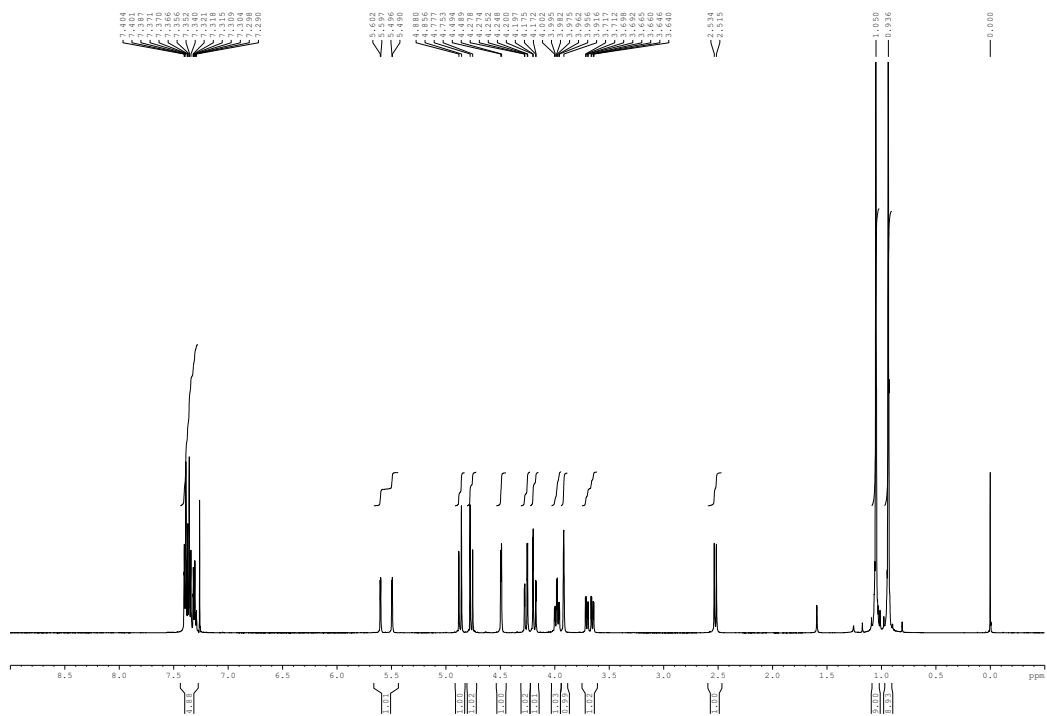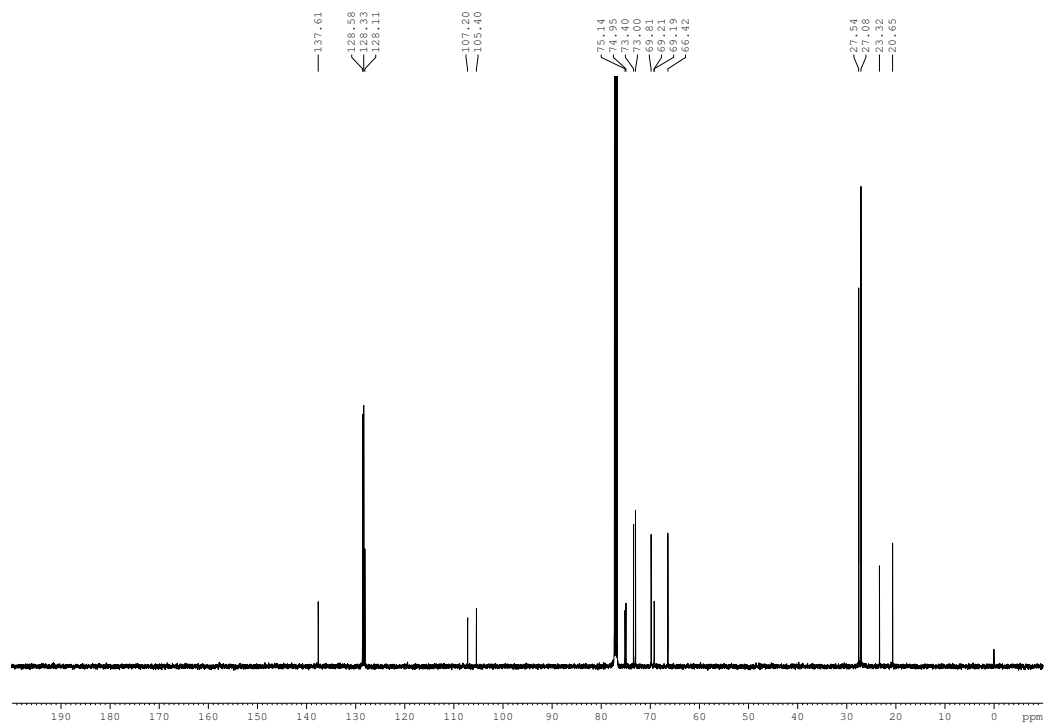

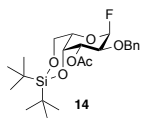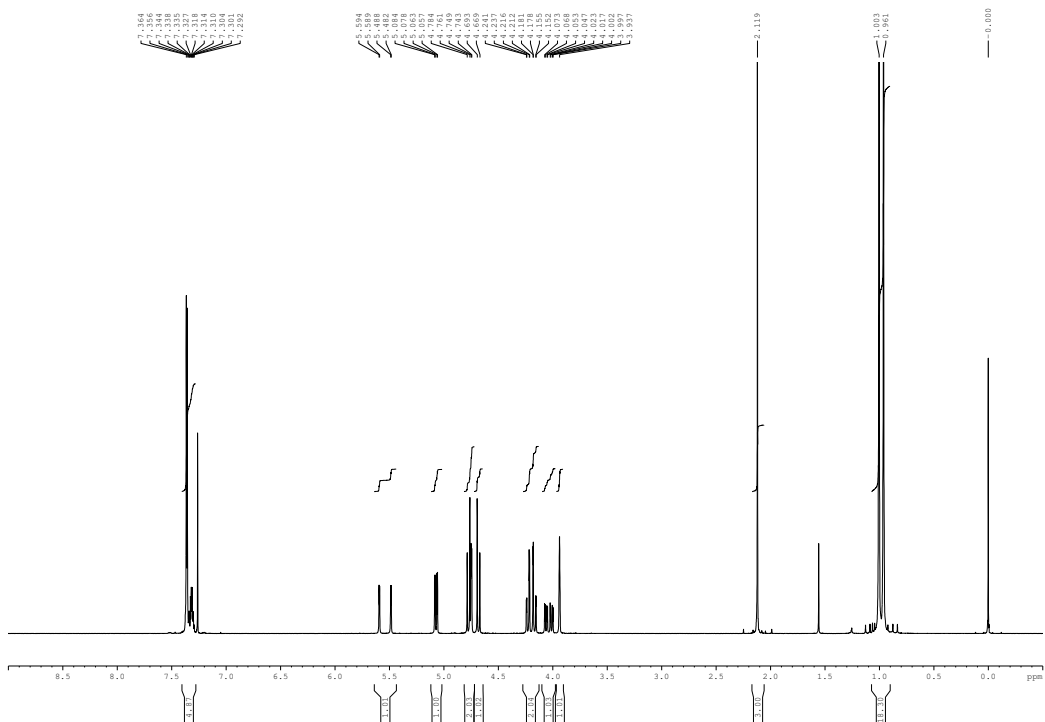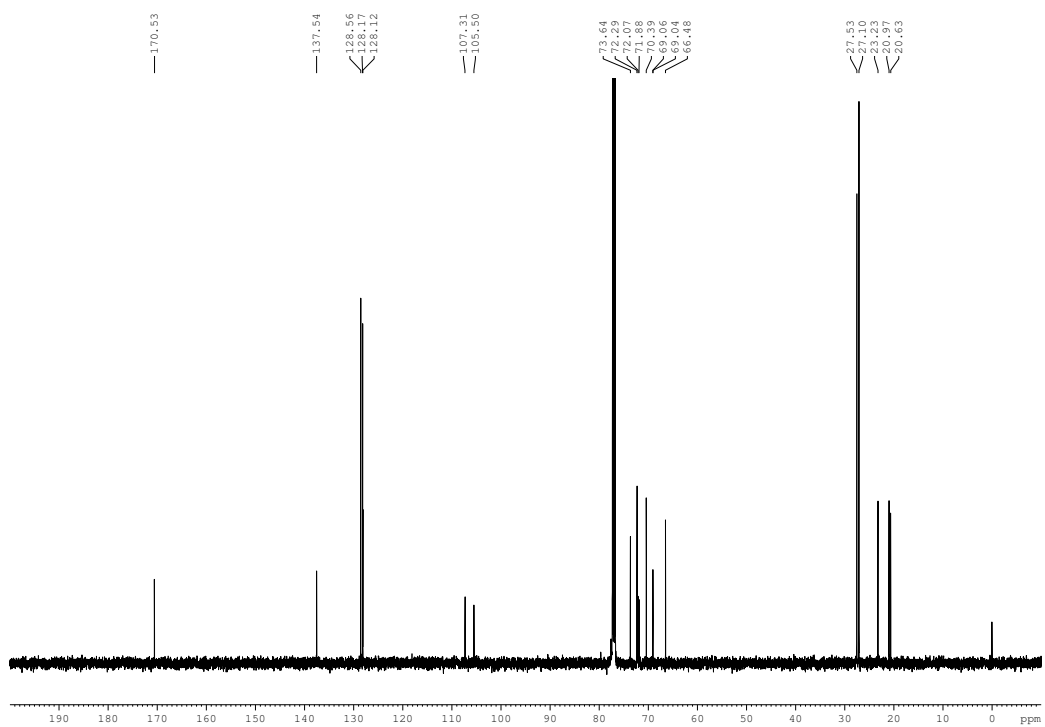

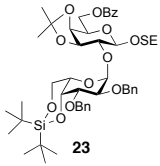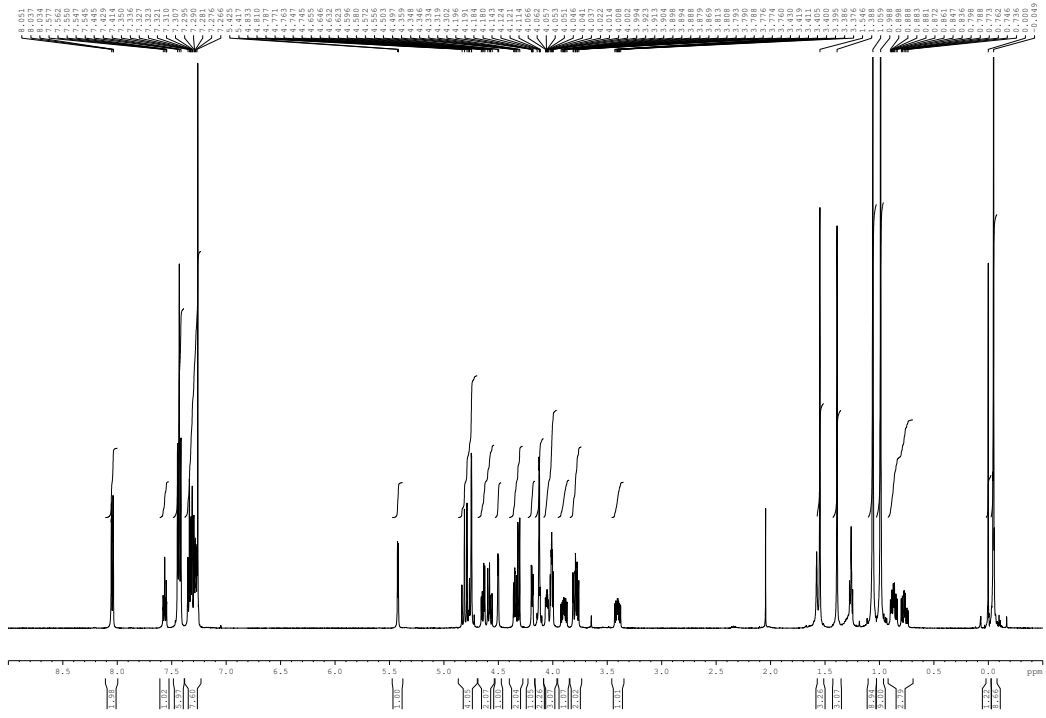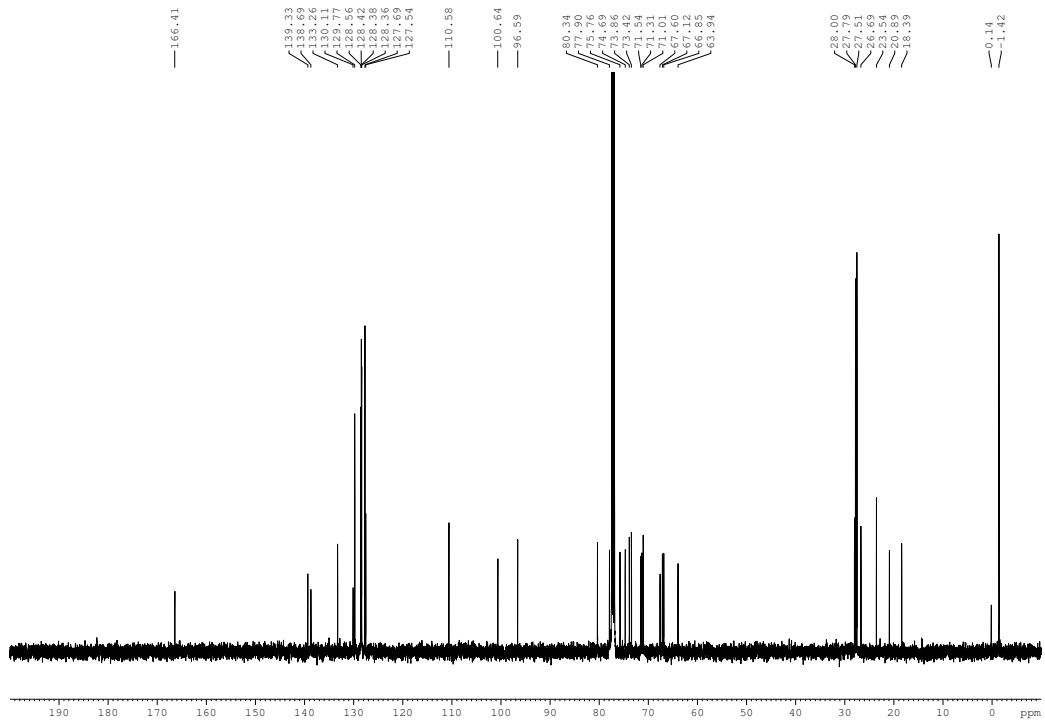

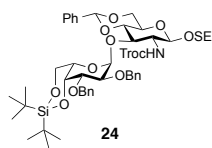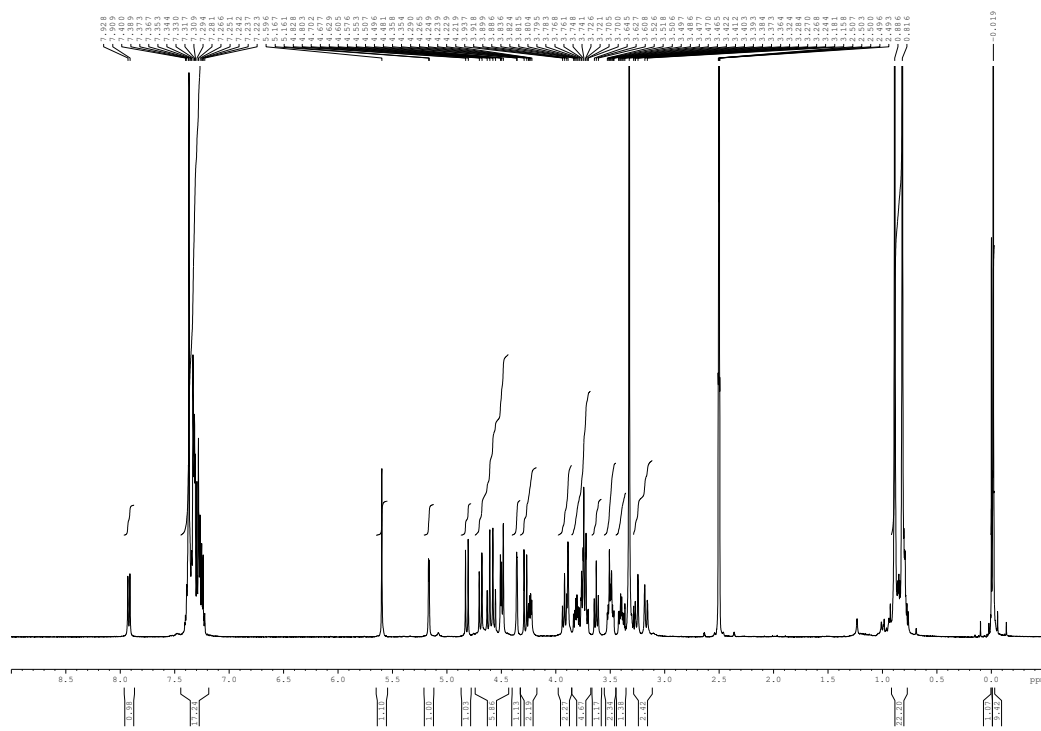

- 153.86
- 138.97
- 138.59
- 137.28
- 129.46
- 128.45
- 128.43
- 128.29
- 127.70
- 127.61
- 126.28
- 101.94
- 98.25
- 95.67
- 80.48
- 78.29
- 75.30
- 74.91
- 74.41
- 70.78
- 68.94
- 67.81
- 66.83
- 66.21
- 59.79
- 27.71
- 23.45
- 20.80
- 16.19
- 1.25

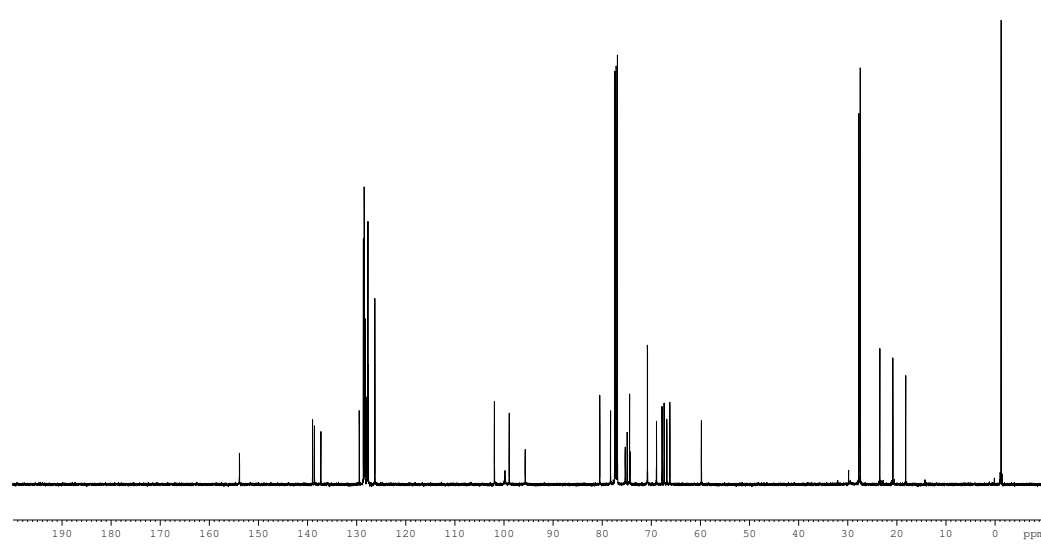



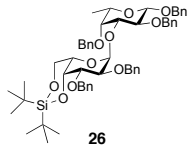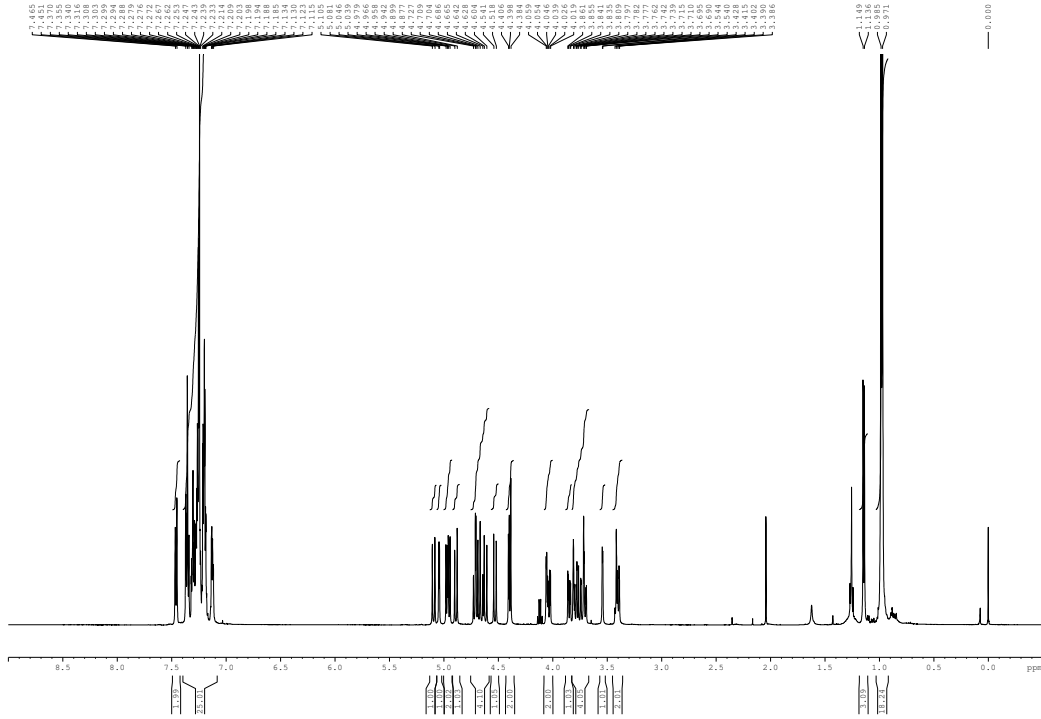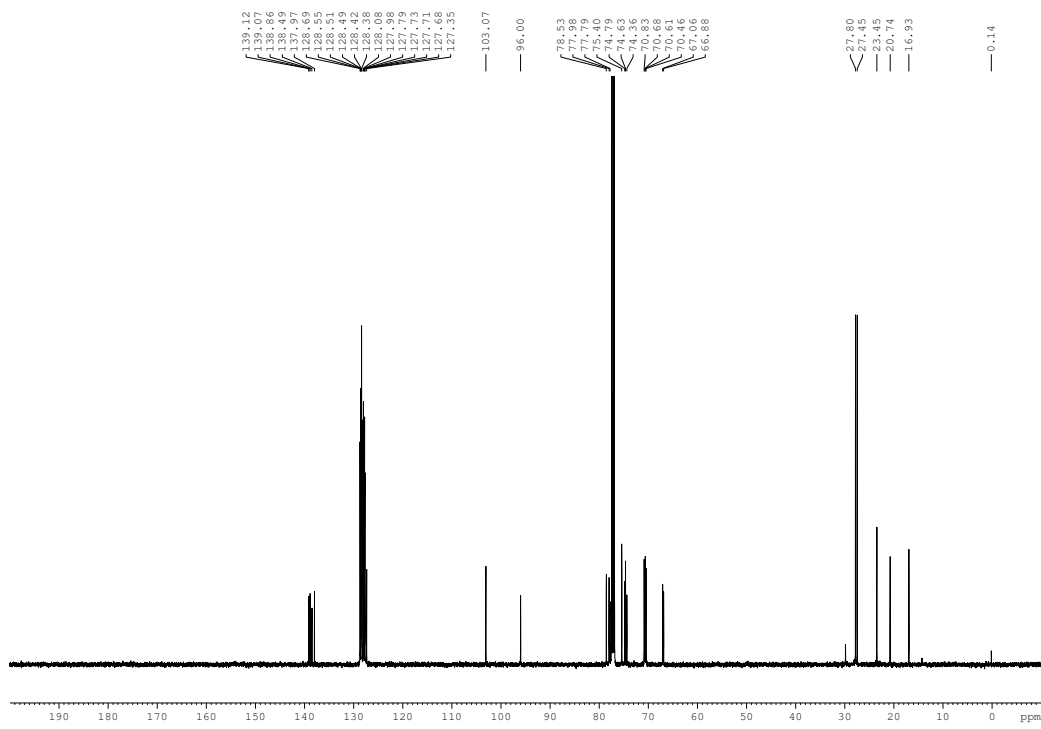



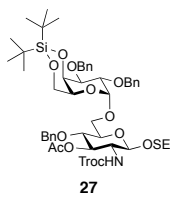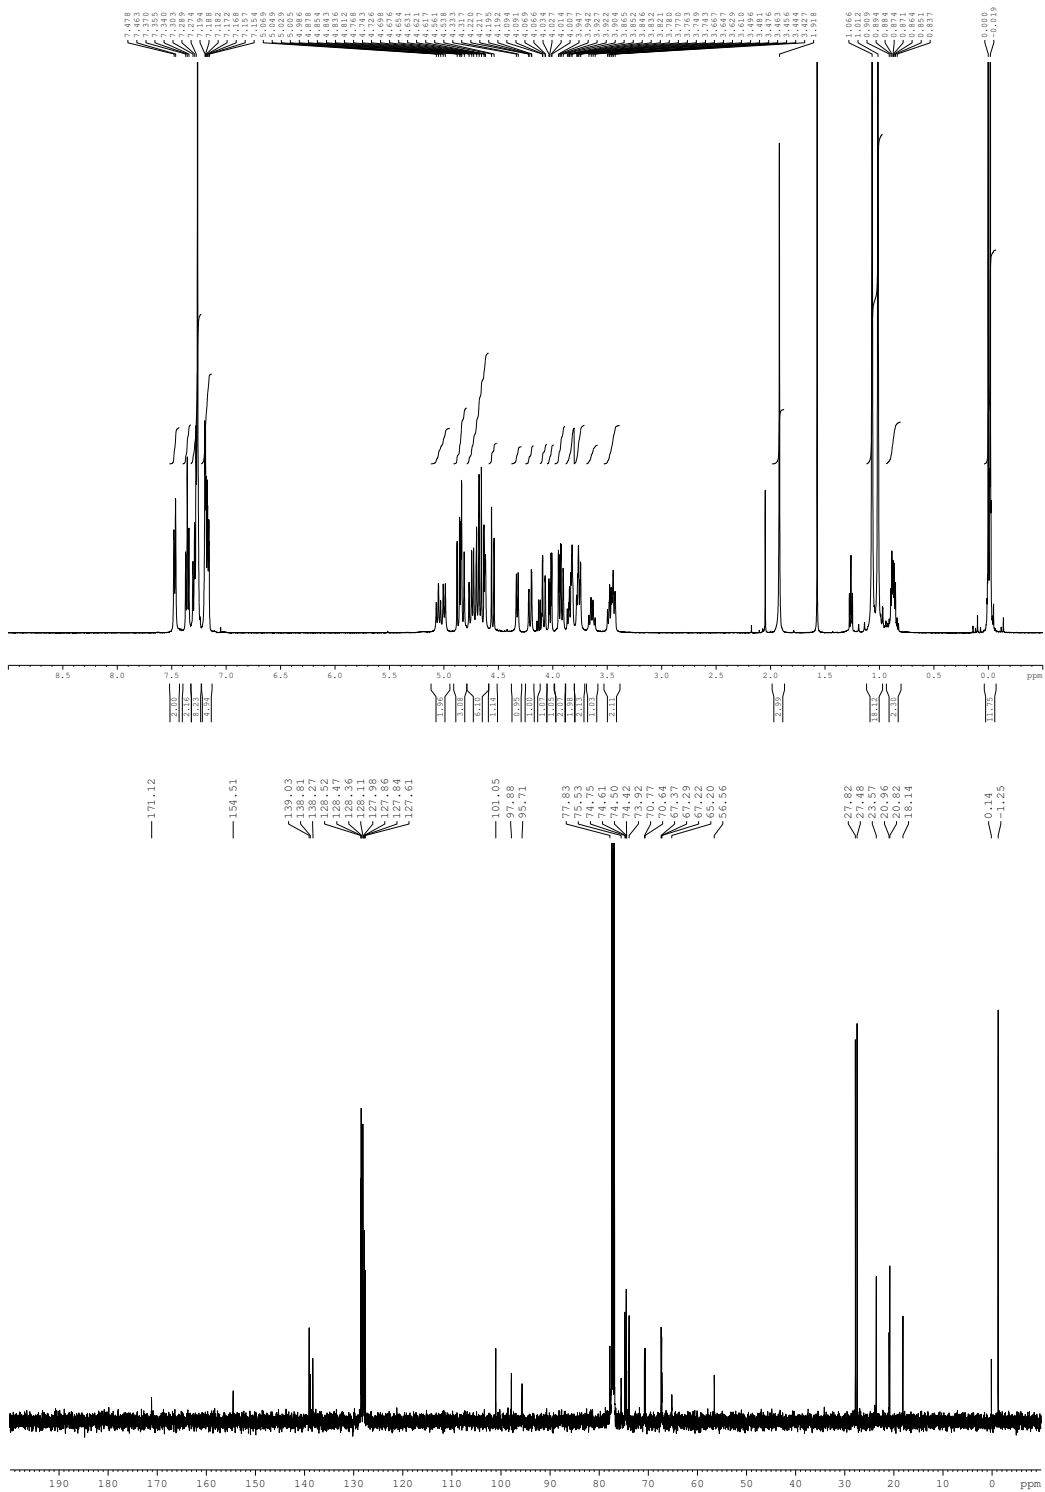

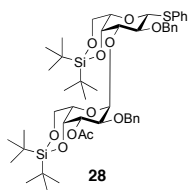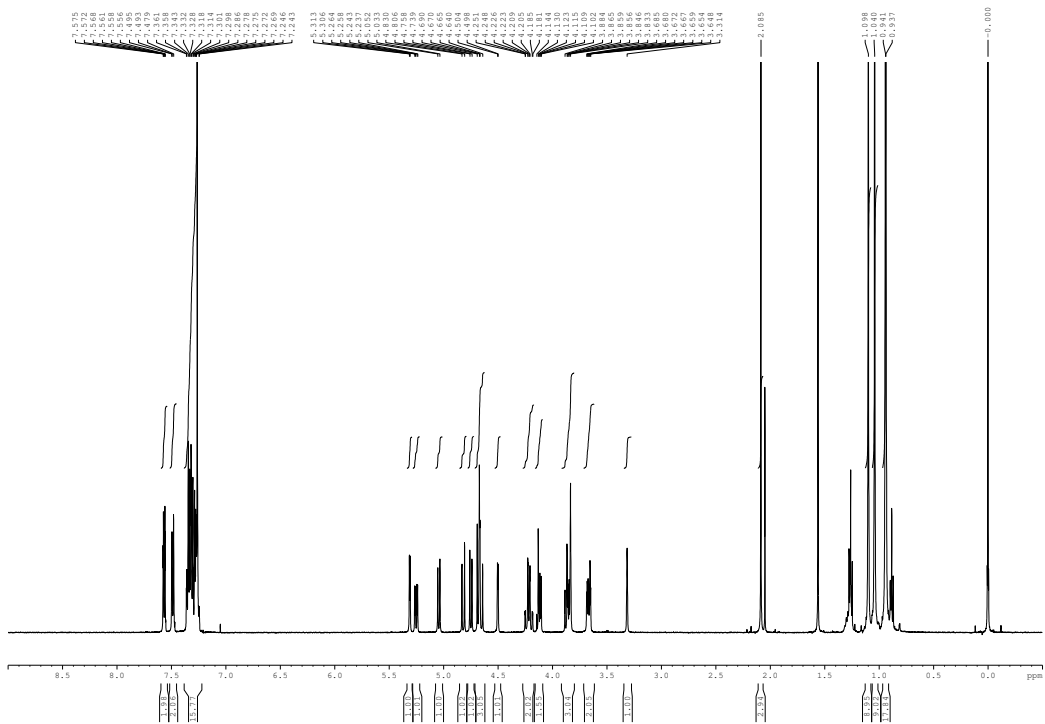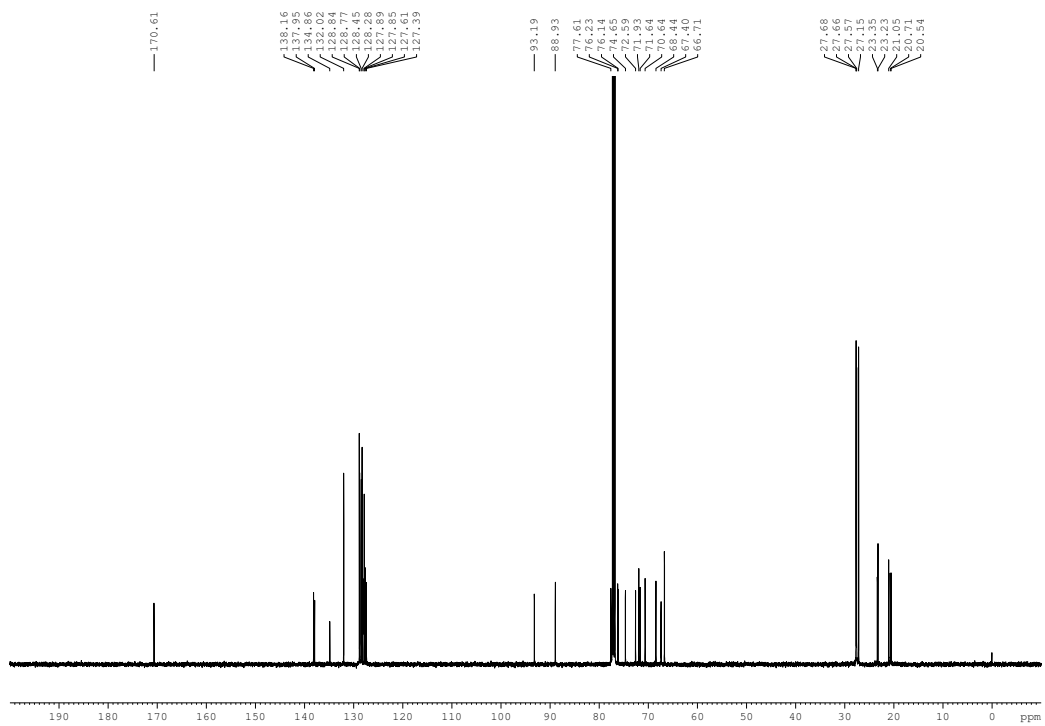





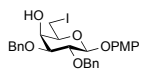

33

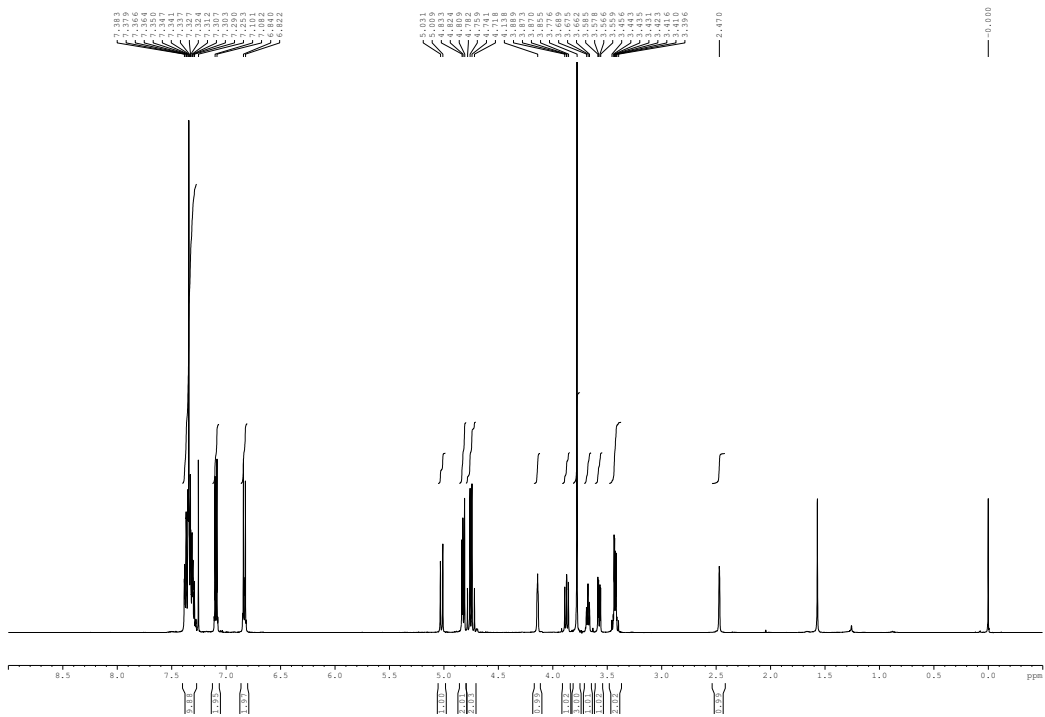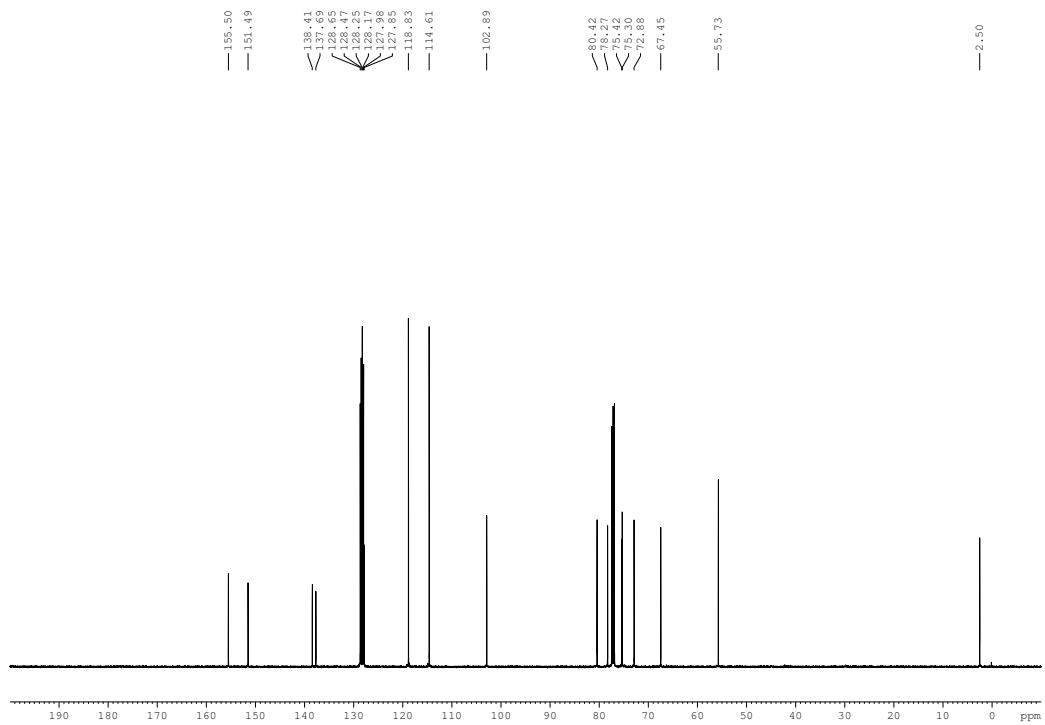

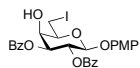

34

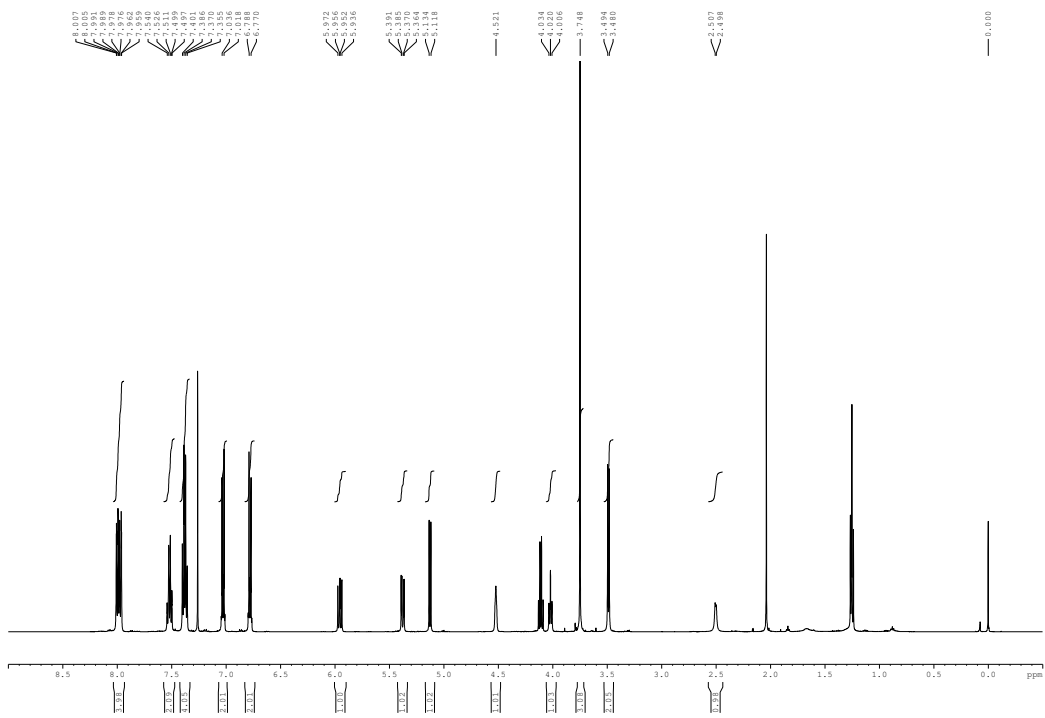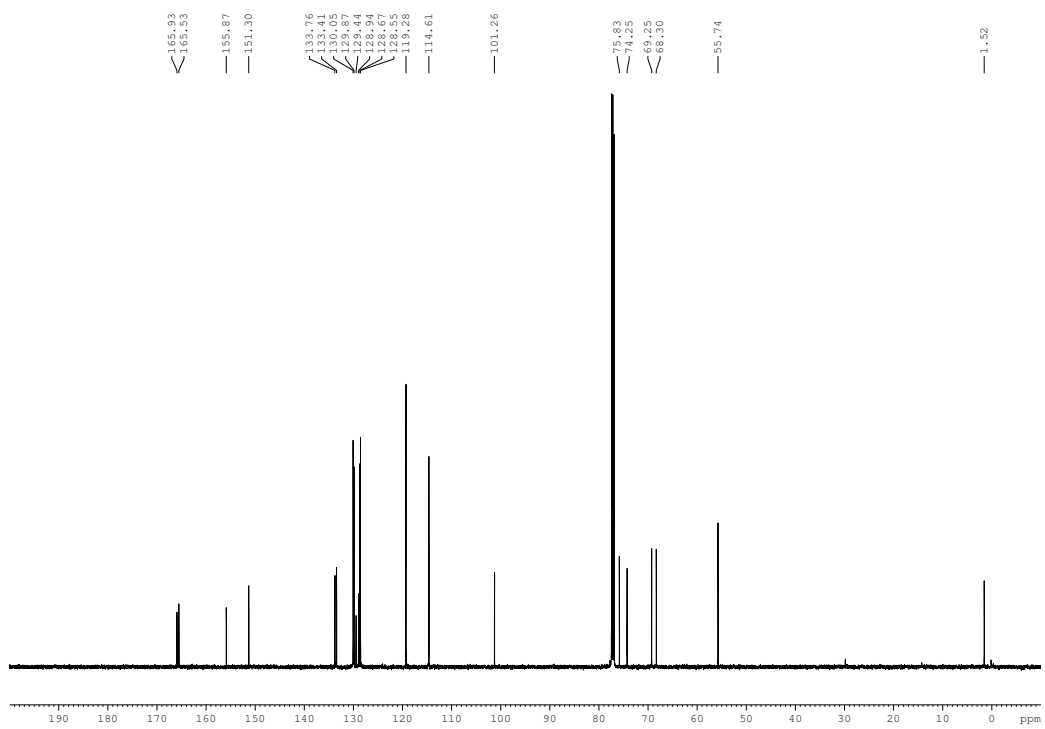

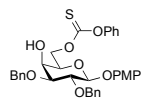

35

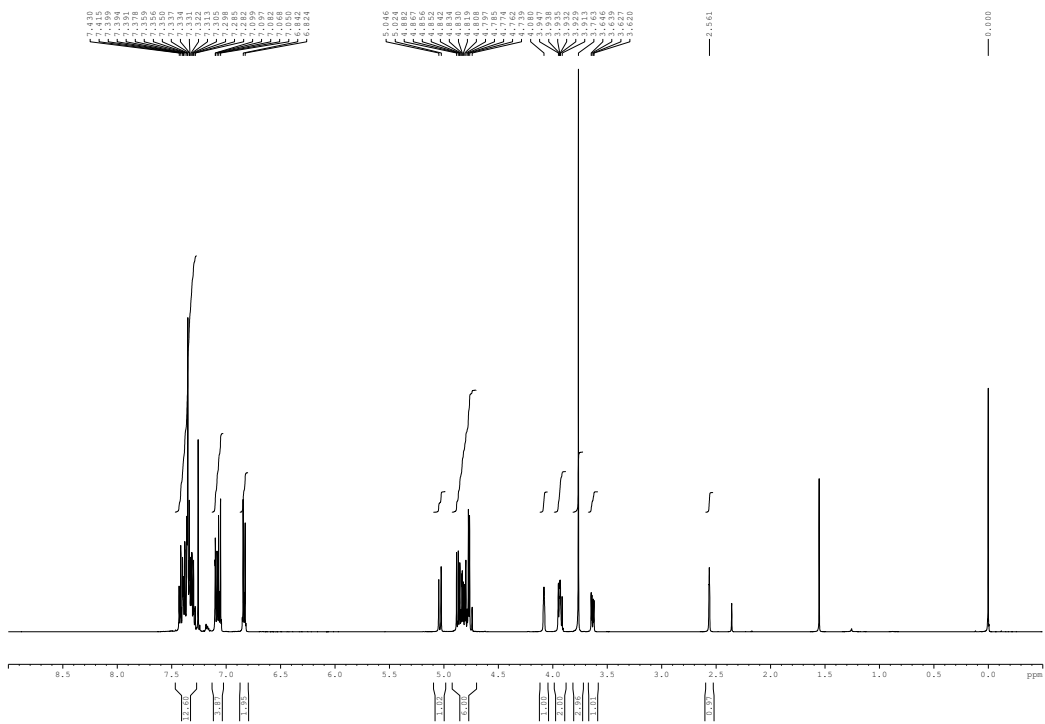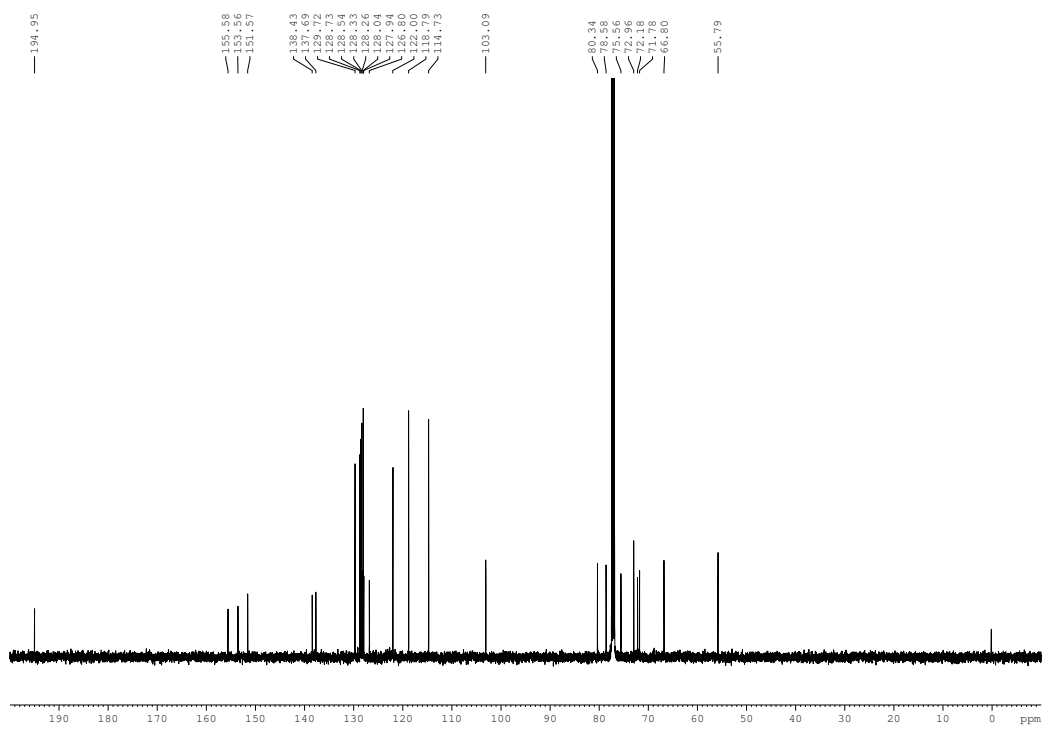

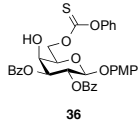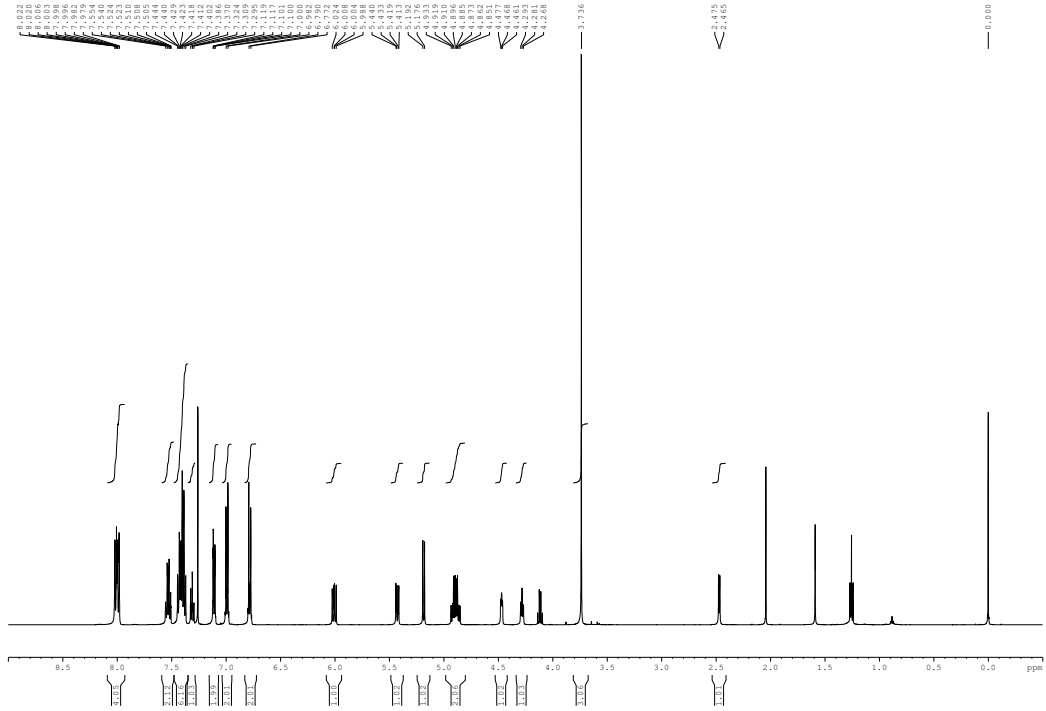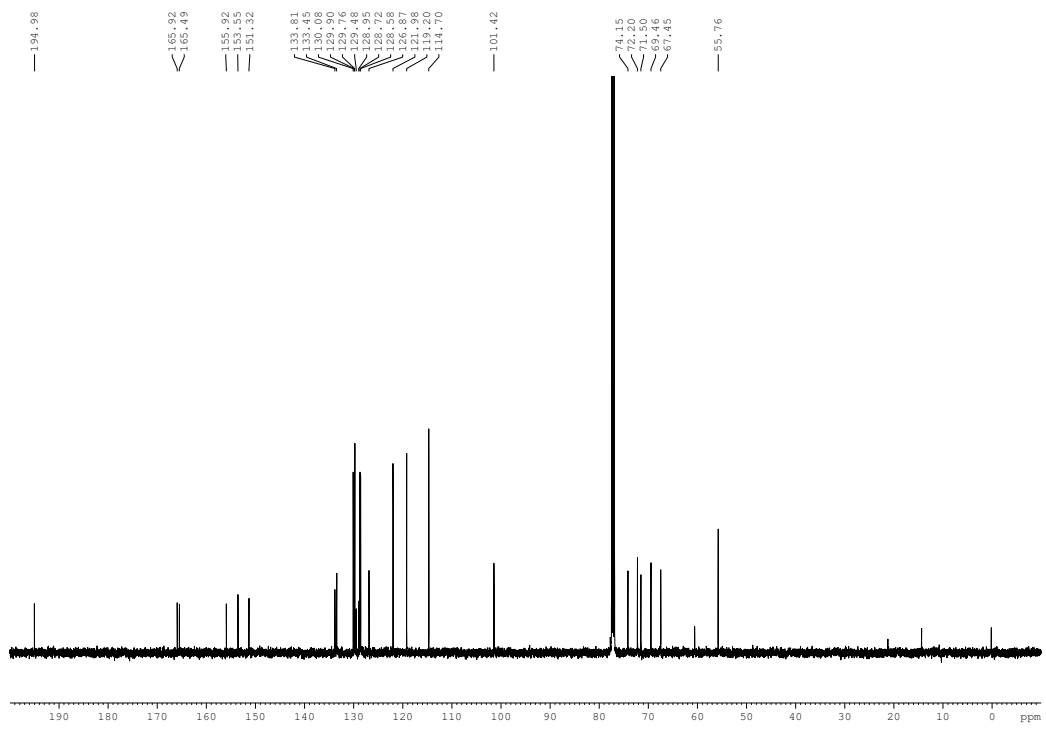





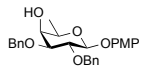

38

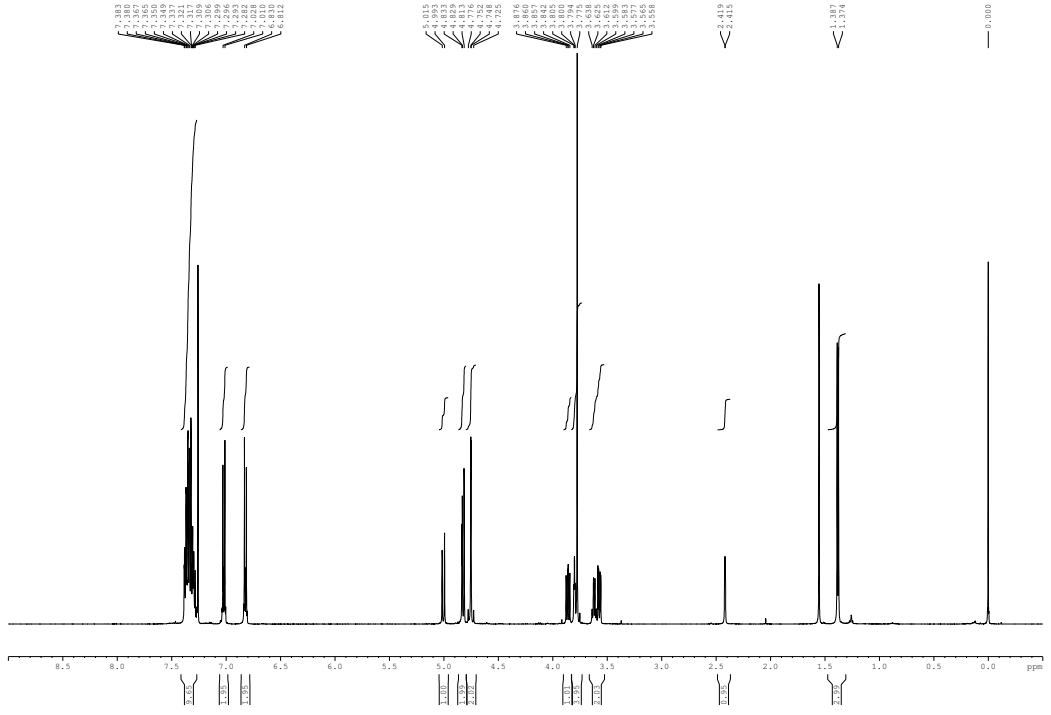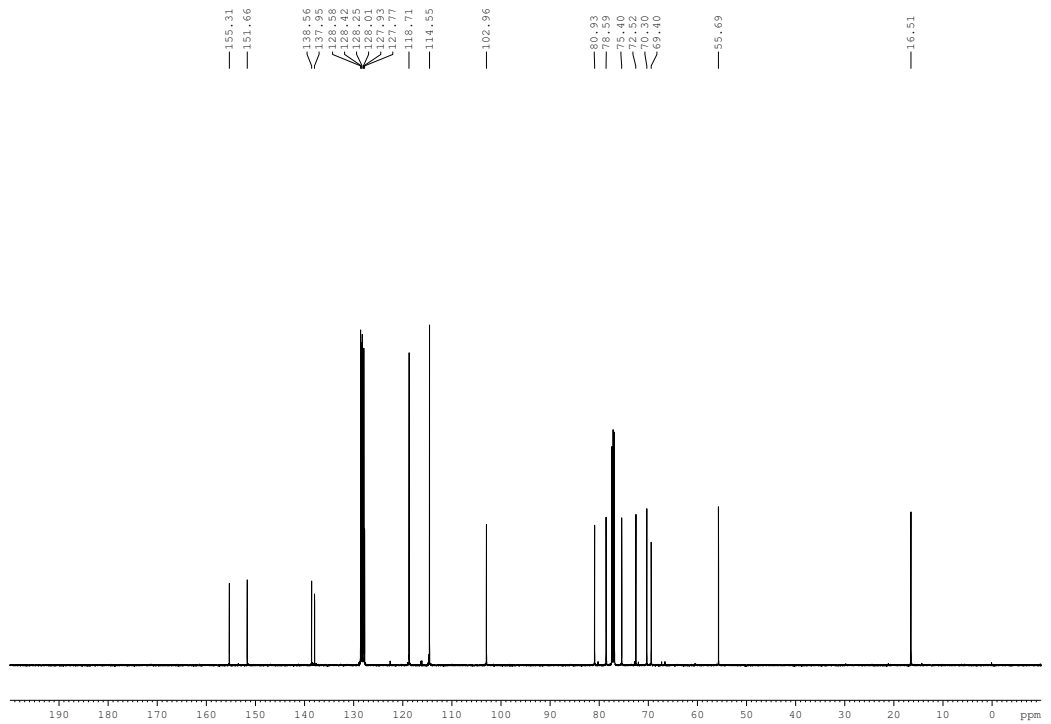

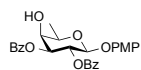

39

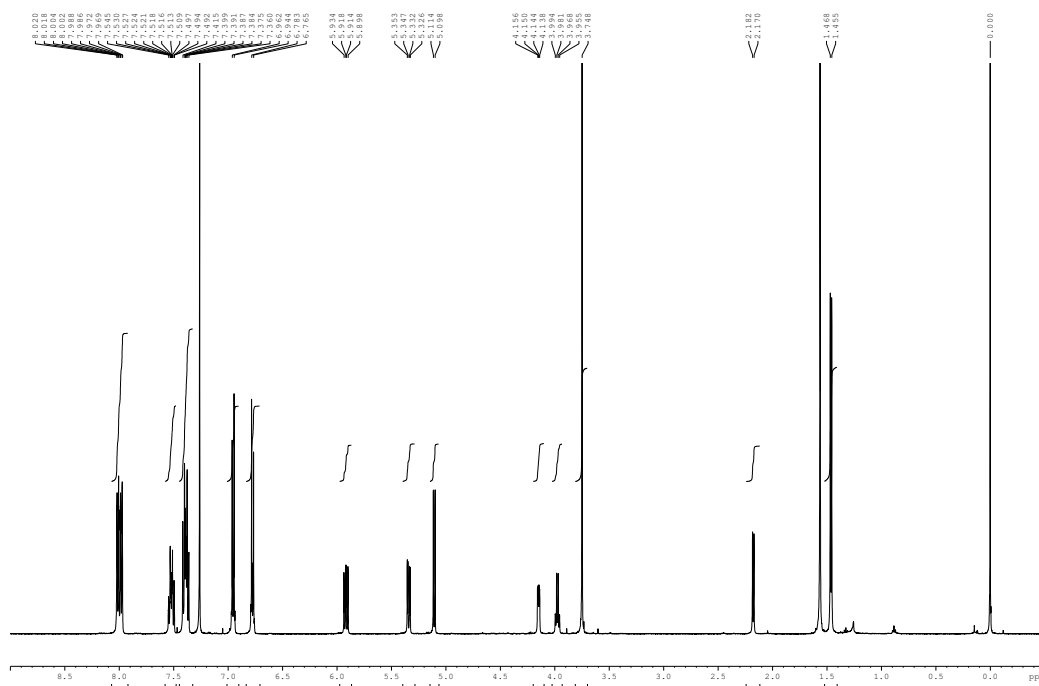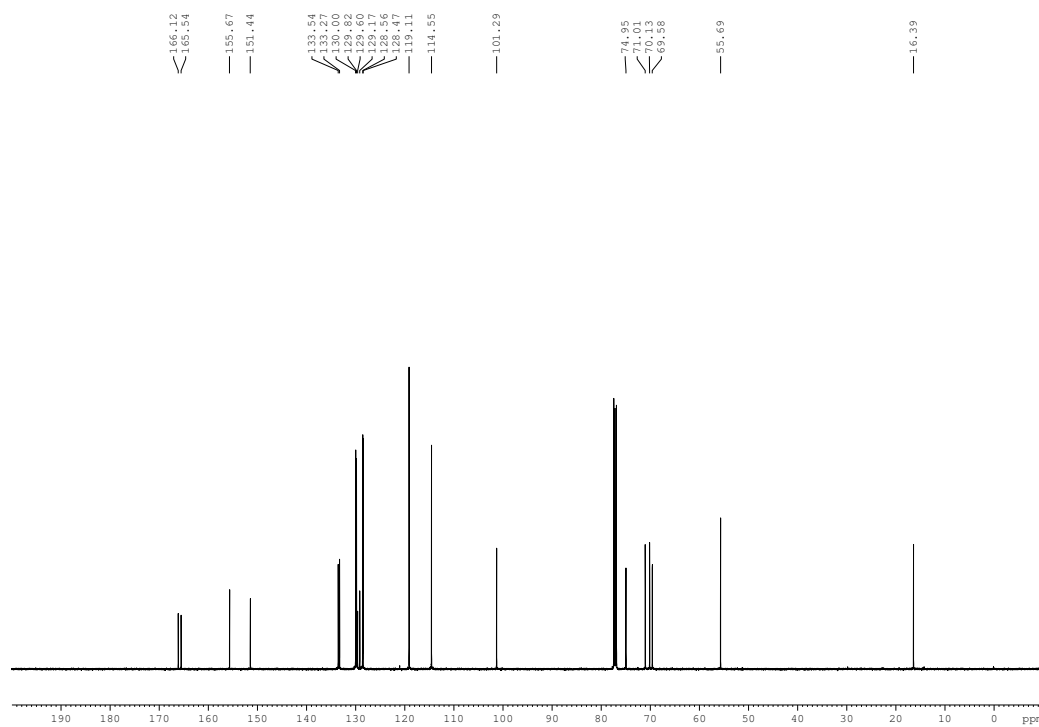

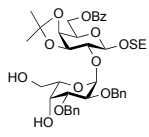

42

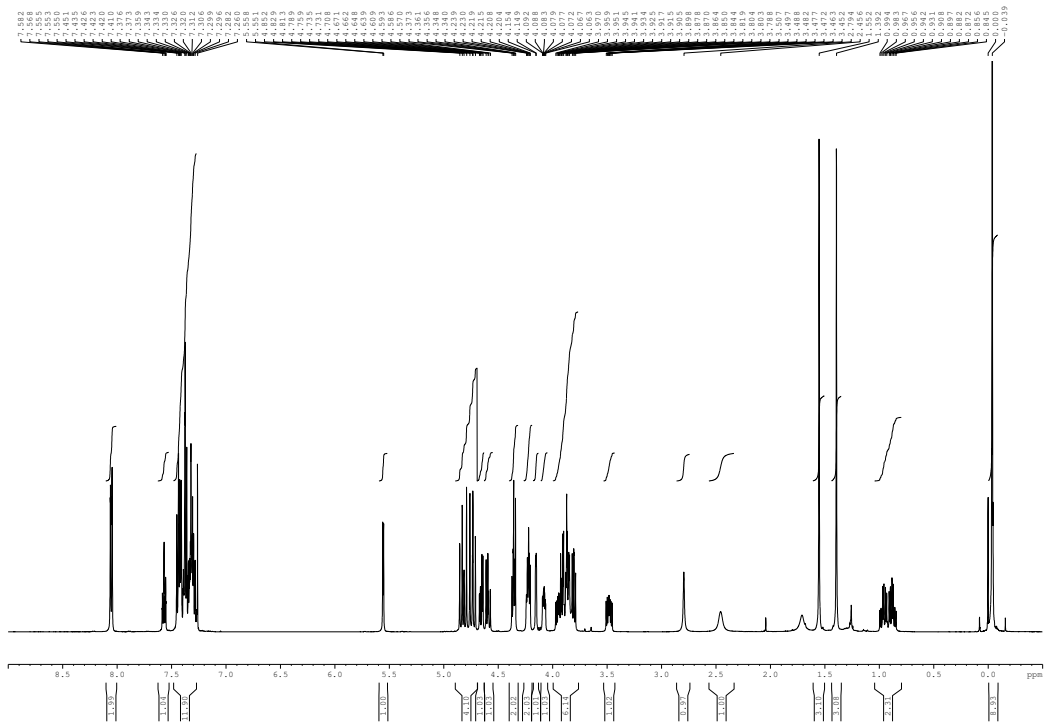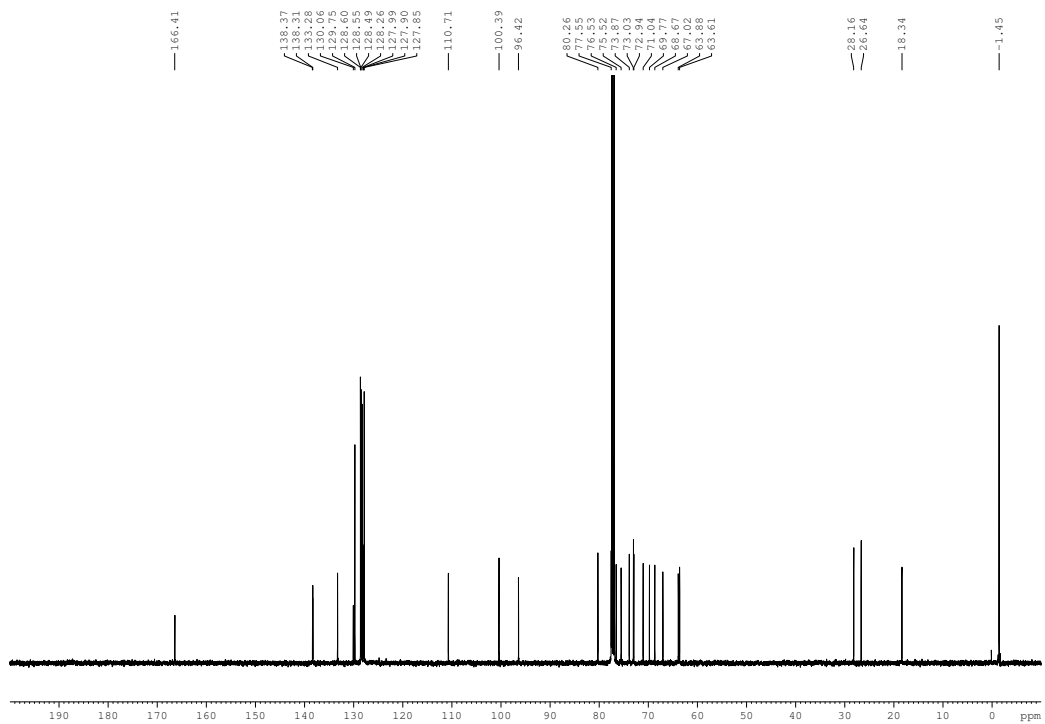

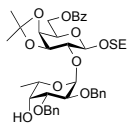

43

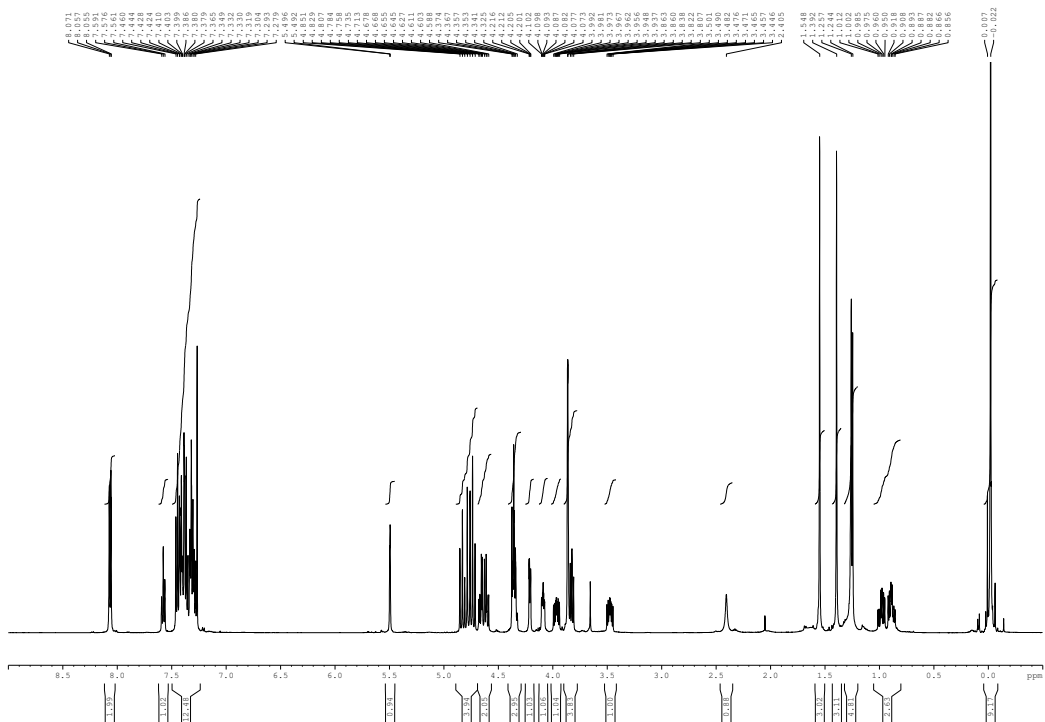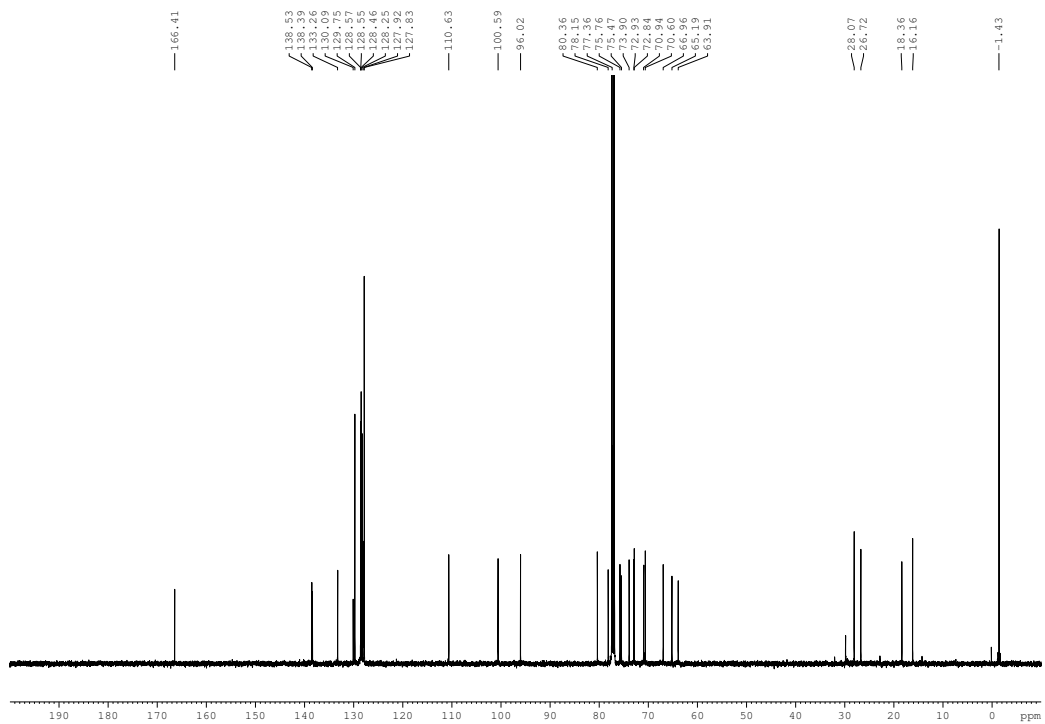

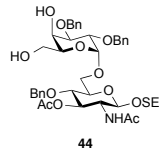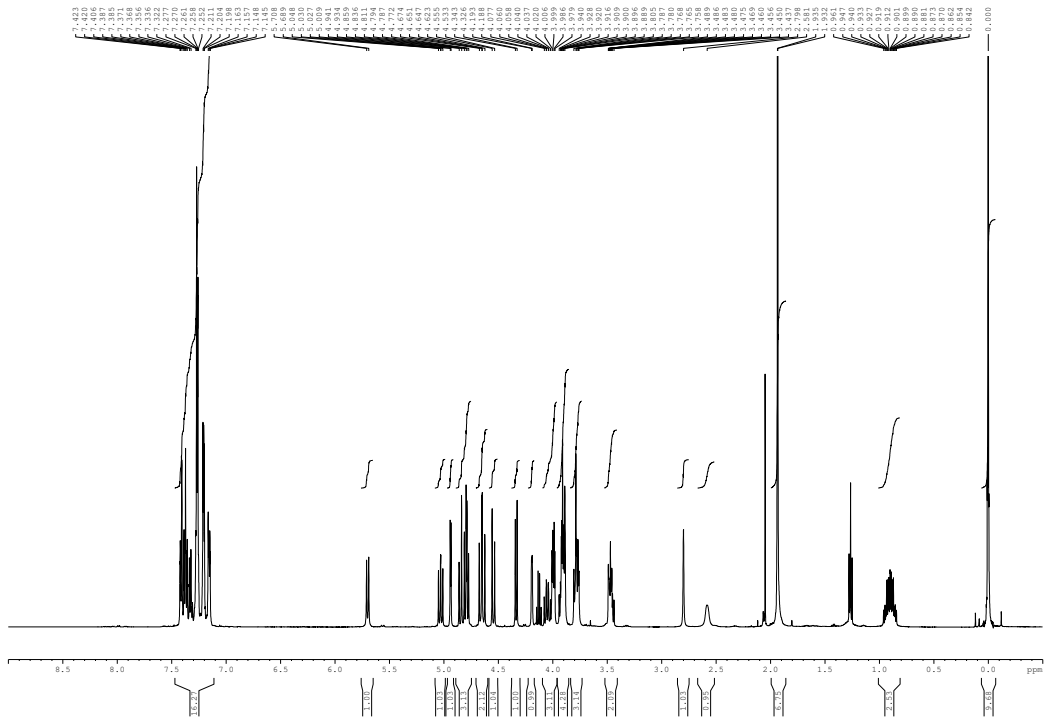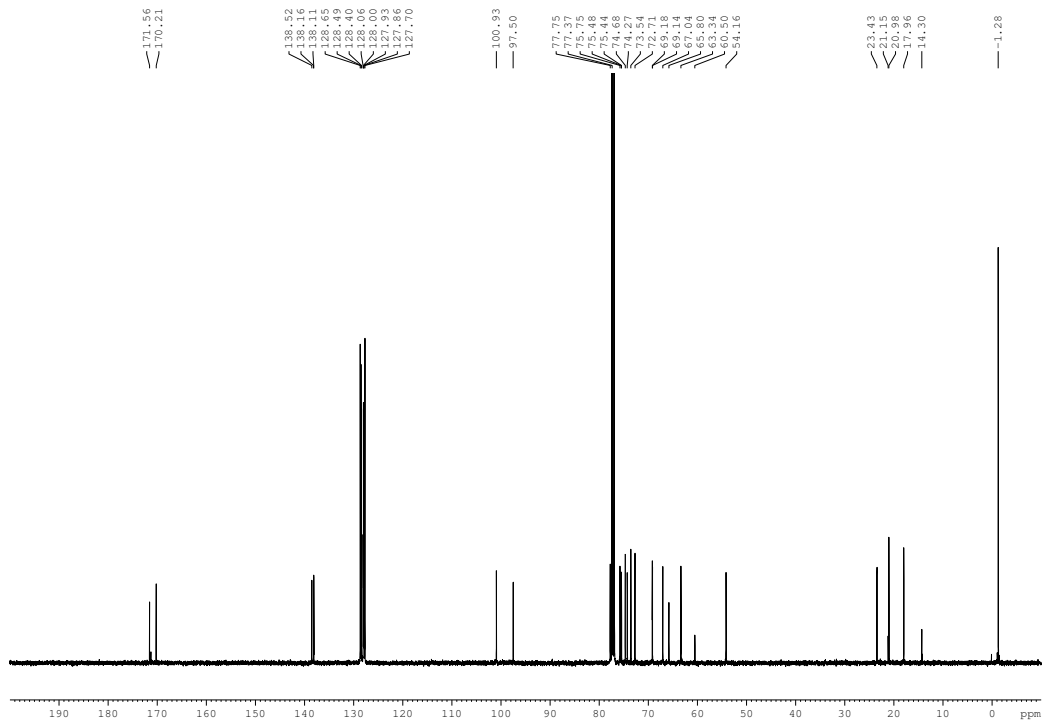

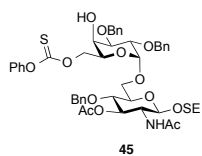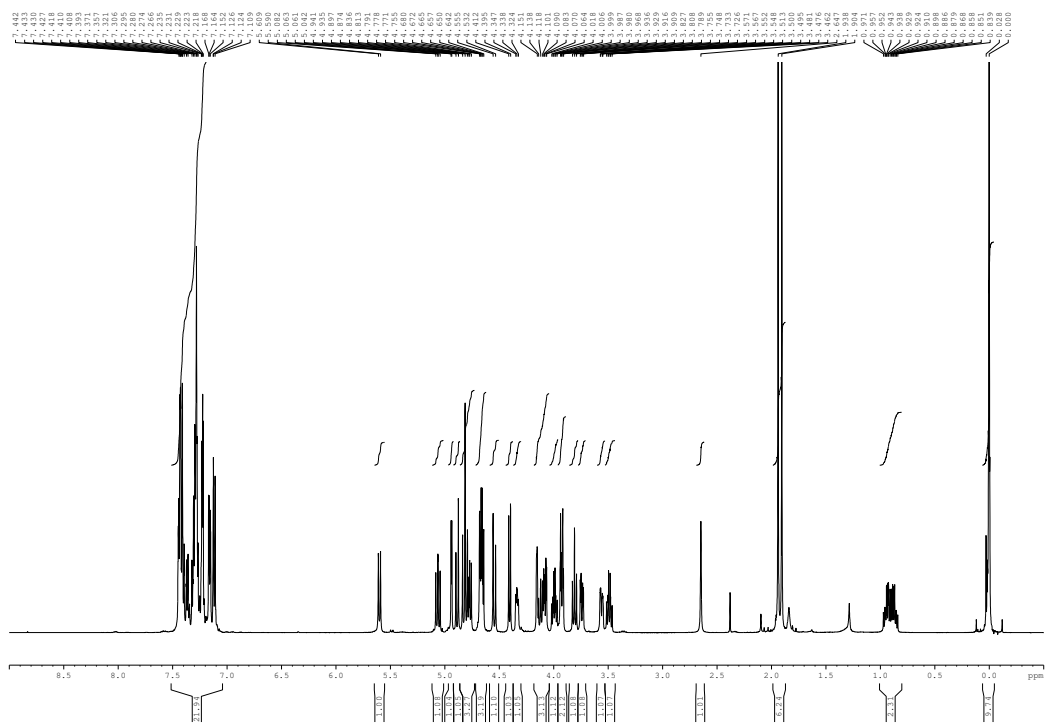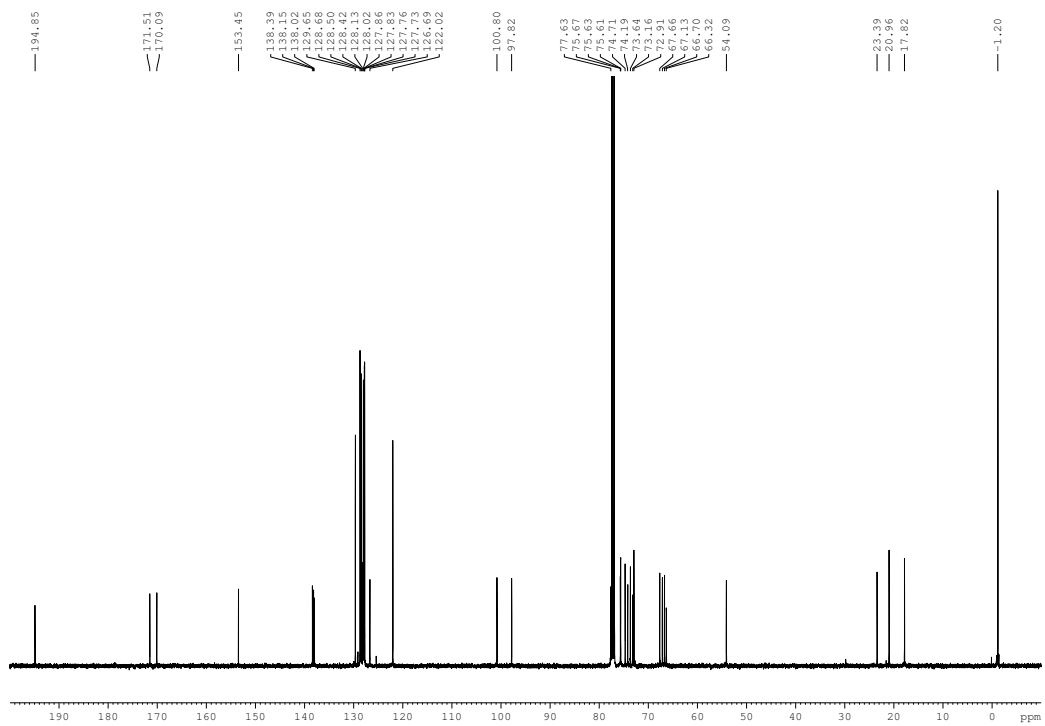

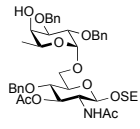

46

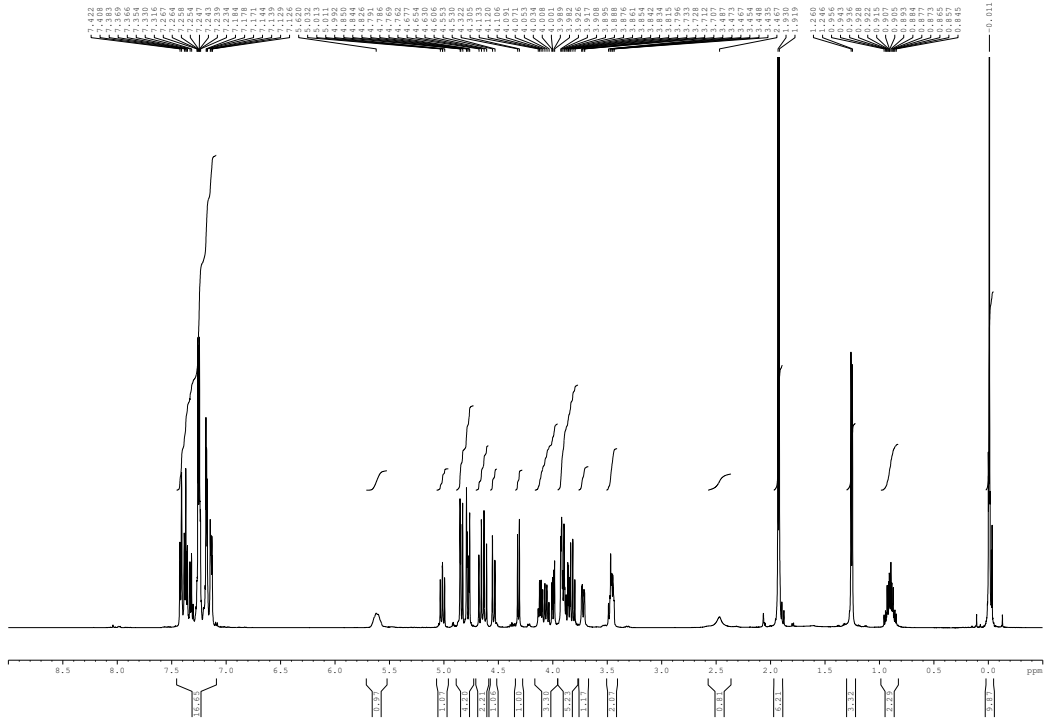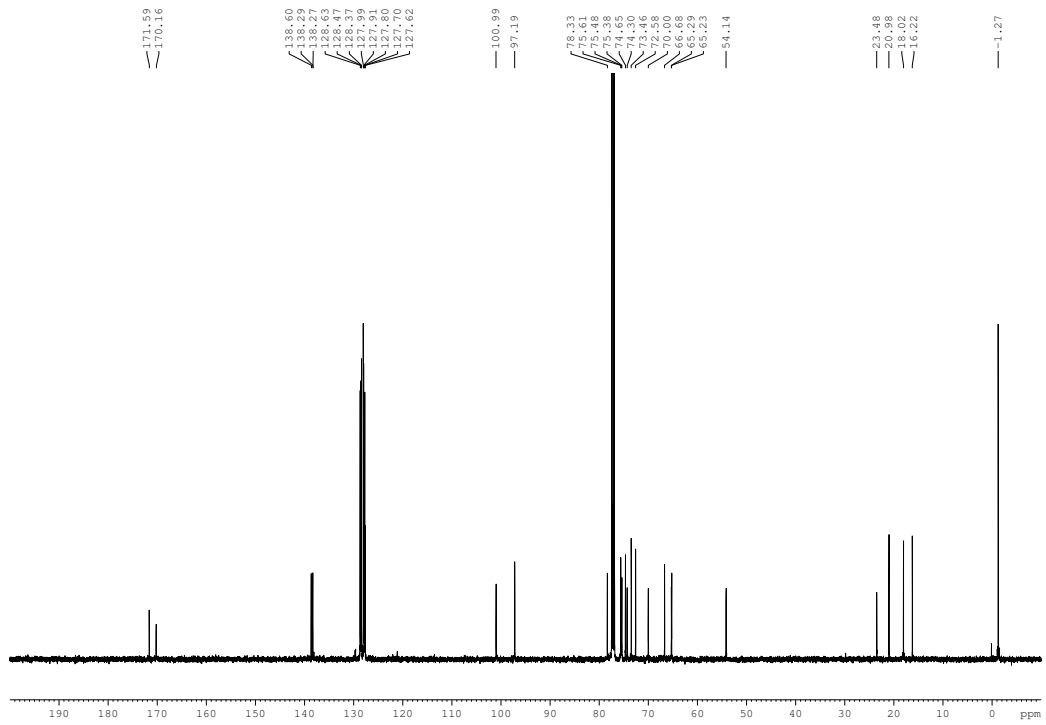



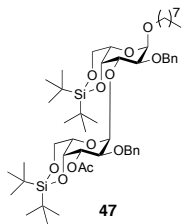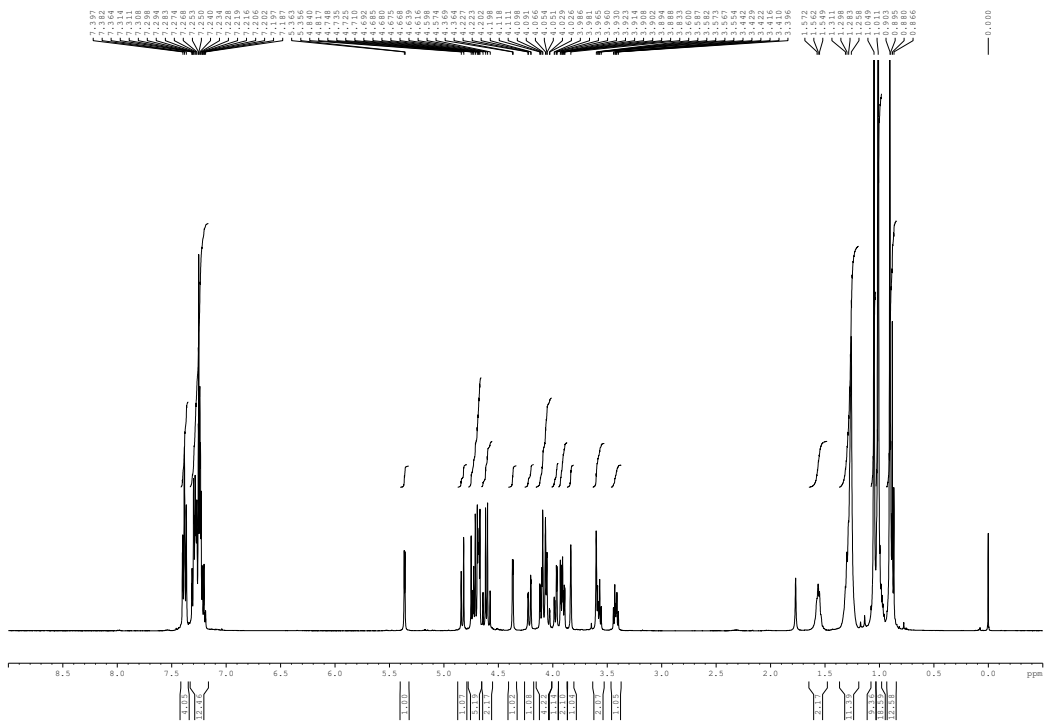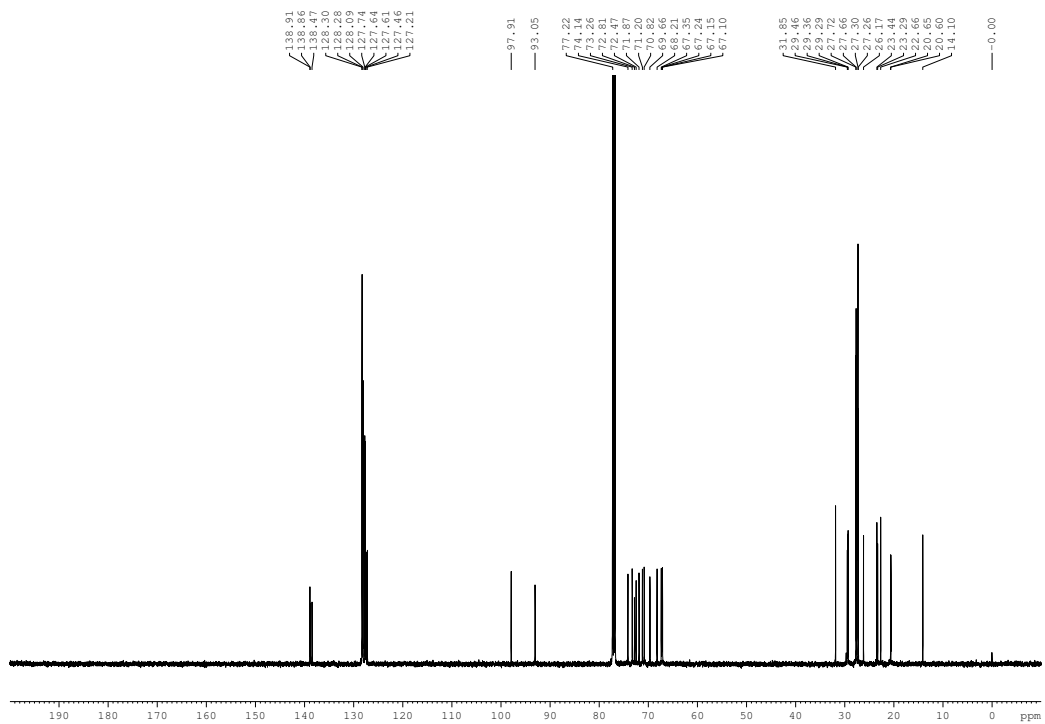

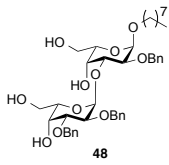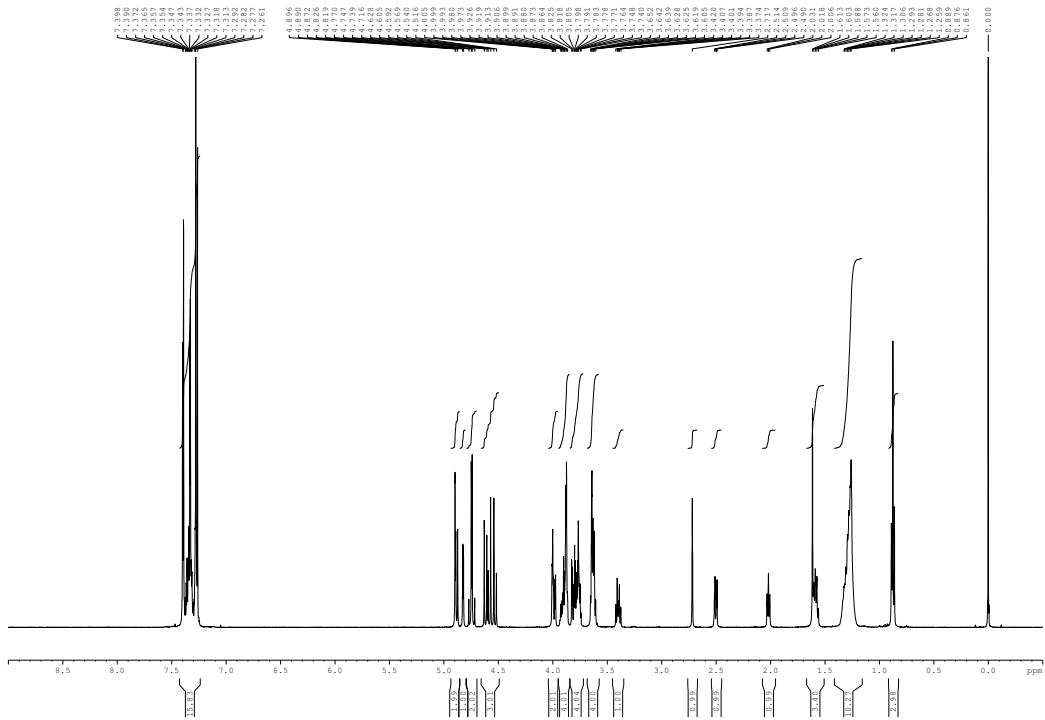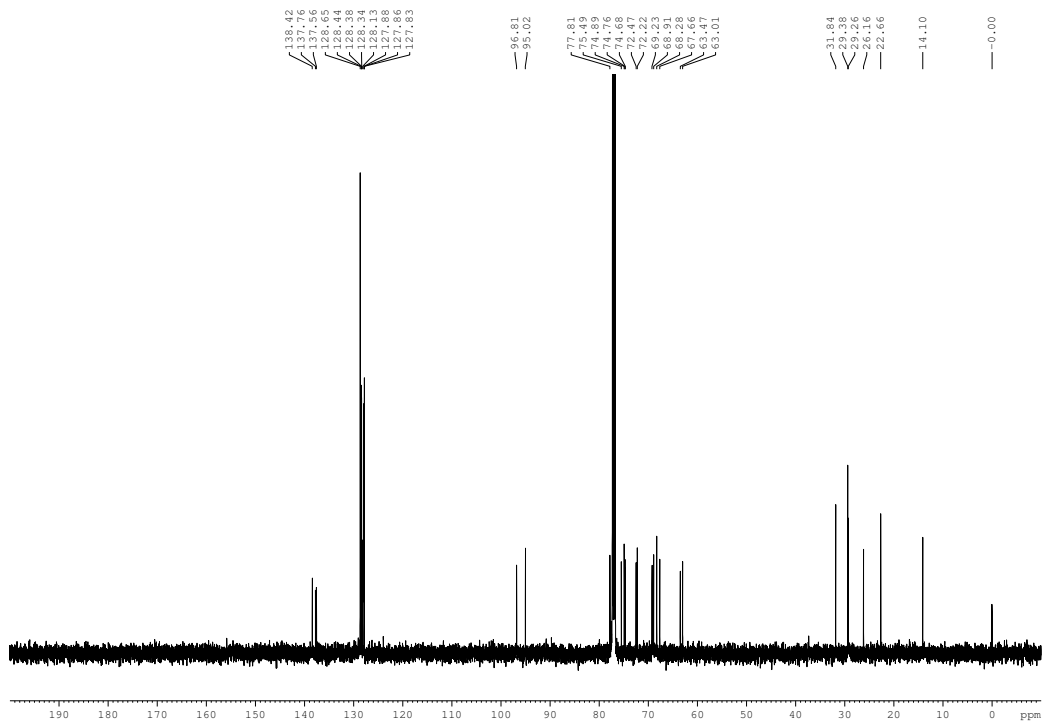

Supplement: d0ob01128b1.pdf [file d0ob01128b1.pdf]
